# Supplementary material
Source: ML conference proceedings conference paper supplement (https://proceedings.mlr.press/v28/kar13.html)
Supplement: Supplementary file 1 [file kar13-supp.pdf]

## A. Proof of Lemma 1

**Lemma 9** (Lemma 1 restated). *Let  $h_1, \dots, h_{n-1}$  be an ensemble of hypotheses generated by an online learning algorithm working with a bounded loss function  $\ell : \mathcal{H} \times \mathcal{Z} \times \mathcal{Z} \rightarrow [0, B]$ . Then for any  $\delta > 0$ , we have with probability at least  $1 - \delta$ ,*

$$\begin{aligned} \frac{1}{n-1} \sum_{t=2}^n \mathcal{L}(h_{t-1}) &\leq \frac{1}{n-1} \sum_{t=2}^n \hat{\mathcal{L}}_t(h_{t-1}) \\ &\quad + \frac{2}{n-1} \sum_{t=2}^n \mathcal{R}_{t-1}(\ell \circ \mathcal{H}) + 3B \sqrt{\frac{\log \frac{n}{\delta}}{n-1}}. \end{aligned}$$

*Proof.* As a first step, we decompose the excess risk in a manner similar to (Wang et al., 2012). For any  $h \in \mathcal{H}$  let

$$\tilde{\mathcal{L}}_t(h) := \mathbb{E}_{\mathbf{z}_t} \left[ \hat{\mathcal{L}}_t(h) \middle| Z^{t-1} \right].$$

This allows us to decompose the excess risk as follows:

$$\begin{aligned} \frac{1}{n-1} \sum_{t=2}^n \mathcal{L}(h_{t-1}) - \hat{\mathcal{L}}_t(h_{t-1}) \\ = \frac{1}{n-1} \left( \underbrace{\sum_{t=2}^n \mathcal{L}(h_{t-1}) - \tilde{\mathcal{L}}_t(h_{t-1})}_{P_t} + \underbrace{\sum_{t=2}^n \tilde{\mathcal{L}}_t(h_{t-1}) - \hat{\mathcal{L}}_t(h_{t-1})}_{Q_t} \right). \end{aligned}$$

By construction, we have  $\mathbb{E}_{\mathbf{z}_t} [\tilde{\mathcal{L}}_t(h_{t-1}) | Z^{t-1}] = 0$  and hence the sequence  $Q_2, \dots, Q_n$  forms a martingale difference sequence. Since  $|Q_t| \leq B$  as the loss function is bounded, an application of the Azuma-Hoeffding inequality shows that with probability at least  $1 - \delta$

$$\frac{1}{n-1} \sum_{t=2}^n Q_t \leq B \sqrt{\frac{2 \log \frac{1}{\delta}}{n-1}}. \quad (4)$$

We now analyze each term  $P_t$  individually. By linearity of expectation, we have for a ghost sample  $\tilde{Z}^{t-1} = \{\tilde{\mathbf{z}}_1, \dots, \tilde{\mathbf{z}}_{t-1}\}$ ,

$$\mathcal{L}(h_{t-1}) = \mathbb{E}_{\tilde{Z}^{t-1}} \left[ \frac{1}{t-1} \sum_{\tau=1}^{t-1} \mathbb{E}_{\mathbf{z}} [\ell(h_{t-1}, \mathbf{z}, \tilde{\mathbf{z}}_\tau)] \right]. \quad (5)$$

The expression of  $\mathcal{L}(h_{t-1})$  as a nested expectation is the precursor to performing symmetrization with expectations and plays a crucial role in overcoming coupling problems. This allows us to write  $P_t$  as

$$\begin{aligned} P_t &= \mathbb{E}_{\tilde{Z}^{t-1}} \left[ \frac{1}{t-1} \sum_{\tau=1}^{t-1} \mathbb{E}_{\mathbf{z}} [\ell(h_{t-1}, \mathbf{z}, \tilde{\mathbf{z}}_\tau)] \right] - \tilde{\mathcal{L}}_t(h_{t-1}) \\ &\leq \underbrace{\sup_{h \in \mathcal{H}} \left[ \mathbb{E}_{\tilde{Z}^{t-1}} \left[ \frac{1}{t-1} \sum_{\tau=1}^{t-1} \mathbb{E}_{\mathbf{z}} [\ell(h, \mathbf{z}, \tilde{\mathbf{z}}_\tau)] \right] - \tilde{\mathcal{L}}_t(h) \right]}_{g_t(\mathbf{z}_1, \dots, \mathbf{z}_{t-1})}. \end{aligned}$$

Since  $\tilde{\mathcal{L}}_t(h) = \mathbb{E}_{\mathbf{z}} \left[ \frac{1}{t-1} \sum_{\tau=1}^{t-1} \ell(h, \mathbf{z}, \mathbf{z}_\tau) \middle| Z^{t-1} \right]$  and  $\ell$  is bounded, the expression  $g_t(\mathbf{z}_1, \dots, \mathbf{z}_{t-1})$  can have a variation of at most  $B/(t-1)$  when changing any of its  $(t-1)$  variables. Hence an application of McDiarmid's inequality gives us, with probability at least  $1 - \delta$ ,

$$g_t(\mathbf{z}_1, \dots, \mathbf{z}_{t-1}) \leq \mathbb{E}_{Z^{t-1}} [g_t(\mathbf{z}_1, \dots, \mathbf{z}_{t-1})] + B \sqrt{\frac{\log \frac{1}{\delta}}{2(t-1)}}.$$

For any  $h \in \mathcal{H}$ ,  $\mathbf{z}' \in \mathcal{Z}$ , let  $\wp(h, \mathbf{z}') := \frac{1}{t-1} \mathbb{E}_{\mathbf{z}} [\ell(h, \mathbf{z}, \mathbf{z}')]$ . Then we can write  $\mathbb{E}_{Z^{t-1}} [g_t(\mathbf{z}_1, \dots, \mathbf{z}_{t-1})]$  as

$$\begin{aligned} &\mathbb{E}_{Z^{t-1}} \left[ \sup_{h \in \mathcal{H}} \left[ \mathbb{E}_{\tilde{Z}^{t-1}} \left[ \sum_{\tau=1}^{t-1} \wp(h, \tilde{\mathbf{z}}_\tau) \right] - \sum_{\tau=1}^{t-1} \wp(h, \mathbf{z}_\tau) \right] \right] \\ &\leq \mathbb{E}_{Z^{t-1}, \tilde{Z}^{t-1}} \left[ \sup_{h \in \mathcal{H}} \left[ \sum_{\tau=1}^{t-1} \wp(h, \tilde{\mathbf{z}}_\tau) - \sum_{\tau=1}^{t-1} \wp(h, \mathbf{z}_\tau) \right] \right] \\ &= \mathbb{E}_{Z^{t-1}, \tilde{Z}^{t-1}, \{\epsilon_\tau\}} \left[ \sup_{h \in \mathcal{H}} \left[ \sum_{\tau=1}^{t-1} \epsilon_\tau (\wp(h, \tilde{\mathbf{z}}_\tau) - \wp(h, \mathbf{z}_\tau)) \right] \right] \\ &\leq \frac{2}{t-1} \mathbb{E}_{Z^{t-1}, \{\epsilon_\tau\}} \left[ \sup_{h \in \mathcal{H}} \left[ \sum_{\tau=1}^{t-1} \epsilon_\tau \mathbb{E}_{\mathbf{z}} [\ell(h, \mathbf{z}, \mathbf{z}_\tau)] \right] \right] \\ &\leq \frac{2}{t-1} \mathbb{E}_{\mathbf{z}, Z^{t-1}, \{\epsilon_\tau\}} \left[ \sup_{h \in \mathcal{H}} \left[ \sum_{\tau=1}^{t-1} \epsilon_\tau \ell(h, \mathbf{z}, \mathbf{z}_\tau) \right] \right] \\ &= 2\mathcal{R}_{t-1}(\ell \circ \mathcal{H}). \end{aligned}$$

Note that in the third step, the symmetrization was made possible by the decoupling step in Eq. (5) where we decoupled the “head” variable  $\mathbf{z}_t$  from the “tail” variables by absorbing it inside an expectation. This allowed us to symmetrize the true and ghost samples  $\mathbf{z}_\tau$  and  $\tilde{\mathbf{z}}_\tau$  in a standard manner. Thus we have, with probability at least  $1 - \delta$ ,

$$P_t \leq 2\mathcal{R}_{t-1}(\ell \circ \mathcal{H}) + B \sqrt{\frac{\log \frac{1}{\delta}}{2(t-1)}}.$$

Applying a union bound on the bounds for  $P_t, t = 2, \dots, n$  gives us with probability at least  $1 - \delta$ ,

$$\frac{1}{n-1} \sum_{t=2}^n P_t \leq \frac{2}{n-1} \sum_{t=2}^n \mathcal{R}_{t-1}(\ell \circ \mathcal{H}) + B \sqrt{\frac{2 \log \frac{n}{\delta}}{n-1}}. \quad (6)$$

Adding Equations (4) and (6) gives us the result.  $\square$

## B. Proof of Theorem 4

**Theorem 10** (Theorem 4 restated). *Let  $\mathcal{F}$  be a closed and convex set of functions over  $\mathcal{X}$ . Let  $\wp(f, \mathbf{x}) = p(\langle f, \phi(\mathbf{x}) \rangle) + r(f)$ , for a  $\sigma$ -strongly convex function*

$r$ , be a loss function with  $\mathcal{P}$  and  $\hat{\mathcal{P}}$  as the associated population and empirical risk functionals and  $f^*$  as the population risk minimizer. Suppose  $\varphi$  is  $L$ -Lipschitz and  $\|\phi(\mathbf{x})\|_* \leq R, \forall \mathbf{x} \in \mathcal{X}$ . Then w.p.  $1 - \delta$ , for any  $\epsilon > 0$ , we have for all  $f \in \mathcal{F}$ ,

$$\mathcal{P}(f) - \mathcal{P}(f^*) \leq (1 + \epsilon) \left( \hat{\mathcal{P}}(f) - \hat{\mathcal{P}}(f^*) \right) + \frac{C_\delta}{\epsilon \sigma n}$$

where  $C_\delta = C_d^2 \cdot (4(1 + \epsilon)LR)^2 (32 + \log(1/\delta))$  and  $C_d$  is the dependence of the Rademacher complexity of the class  $\mathcal{F}$  on the input dimensionality  $d$ .

*Proof.* We begin with a lemma implicit in the proof of Theorem 1 in (Sridharan et al., 2008). For the function class  $\mathcal{F}$  and loss function  $\varphi$  as above, define a new loss function  $\mu : (f, \mathbf{x}) \mapsto \varphi(f, \mathbf{x}) - \varphi(f^*, \mathbf{x})$  with  $\mathcal{M}$  and  $\hat{\mathcal{M}}$  as the associated population and empirical risk functionals. Let  $r = \frac{4L^2 R^2 C_d^2 (32 + \log(1/\delta))}{\sigma n}$ . Then we have the following

**Lemma 11.** For any  $\epsilon > 0$ , with probability at least  $1 - \delta$ , the following happens

1. For all  $f \in \mathcal{F}$  such that  $\mathcal{M}(f) \leq 16 \left(1 + \frac{1}{\epsilon}\right)^2 r$ , we have  $\mathcal{M}(f) \leq \hat{\mathcal{M}}(f) + 4 \left(1 + \frac{1}{\epsilon}\right) r$ .
2. For all  $f \in \mathcal{F}$  such that  $\mathcal{M}(f) > 16 \left(1 + \frac{1}{\epsilon}\right)^2 r$ , we have  $\mathcal{M}(f) \leq (1 + \epsilon) \hat{\mathcal{M}}(f)$ .

The difference in our proof technique lies in the way we combine these two cases. We do so by proving the following two simple results.

**Lemma 12.** For all  $f$  s.t.  $\mathcal{M}(f) \leq 16 \left(1 + \frac{1}{\epsilon}\right)^2 r$ , we have  $\mathcal{M}(f) \leq (1 + \epsilon) \left( \hat{\mathcal{M}}(f) + 4 \left(1 + \frac{1}{\epsilon}\right) r \right)$ .

*Proof.* We notice that for all  $f \in \mathcal{F}$ , we have  $\mathcal{M}(f) = \mathcal{P}(f) - \mathcal{P}(f^*) \geq 0$ . Thus, using Lemma 11, Part 1, we have  $\hat{\mathcal{M}}(f) + 4 \left(1 + \frac{1}{\epsilon}\right) r \geq \mathcal{M}(f) \geq 0$ . Since for any  $a, \epsilon > 0$ , we have  $a \leq (1 + \epsilon)a$ , the result follows.  $\square$

**Lemma 13.** For all  $f$  s.t.  $\mathcal{M}(f) > 16 \left(1 + \frac{1}{\epsilon}\right)^2 r$ , we have  $\mathcal{M}(f) \leq (1 + \epsilon) \left( \hat{\mathcal{M}}(f) + 4 \left(1 + \frac{1}{\epsilon}\right) r \right)$ .

*Proof.* We use the fact that  $r > 0$  and thus  $4 \left(1 + \frac{1}{\epsilon}\right) r > 0$  as well. The result then follows from an application of Part 2 of Lemma 11.  $\square$

From the definition of the loss function  $\mu$ , we have for any  $f \in \mathcal{F}$ ,  $\mathcal{M}(f) = \mathcal{P}(f) - \mathcal{P}(f^*)$  and  $\hat{\mathcal{M}}(f) = \hat{\mathcal{P}}(f) - \hat{\mathcal{P}}(f^*)$ . Combining the above lemmata with this observation completes the proof.  $\square$

## C. Proof of Theorem 5

**Theorem 14** (Theorem 5 restated). Let  $h_1, \dots, h_{n-1}$  be an ensemble of hypotheses generated by an online learning algorithm working with a  $B$ -bounded,  $L$ -Lipschitz and  $\sigma$ -strongly convex loss function  $\ell$ . Further suppose the learning algorithm guarantees a regret bound of  $\mathfrak{R}_n$ . Let  $\mathfrak{V}_n = \max \{ \mathfrak{R}_n, 2C_d^2 \log n \log(n/\delta) \}$ . Then for any  $\delta > 0$ , we have with probability at least  $1 - \delta$ ,

$$\begin{aligned} \frac{1}{n-1} \sum_{t=2}^n \mathcal{L}(h_{t-1}) &\leq \mathcal{L}(h^*) + \frac{\mathfrak{R}_n}{n-1} \\ &+ C_d \cdot \mathcal{O} \left( \frac{\sqrt{\mathfrak{V}_n \log n \log(n/\delta)}}{n-1} \right), \end{aligned}$$

where the  $\mathcal{O}(\cdot)$  notation hides constants dependent on domain size and the loss function such as  $L, B$  and  $\sigma$ .

*Proof.* The decomposition of the excess risk shall not be made explicitly in this case but shall emerge as a side-effect of the proof progression. Consider the loss function  $\varphi(h, \mathbf{z}') := \mathbb{E}_{\mathbf{z}} [\ell(h, \mathbf{z}, \mathbf{z}')] \mathbf{z}$  with  $\mathcal{P}$  and  $\hat{\mathcal{P}}$  as the associated population and empirical risk functionals. Clearly, if  $\ell$  is  $L$ -Lipschitz and  $\sigma$ -strongly convex then so is  $\varphi$ . As Equation (5) shows, for any  $h \in \mathcal{H}$ ,  $\mathcal{P}(h) = \mathcal{L}(h)$ . Also it is easy to see that for any  $Z^{t-1}$ ,  $\hat{\mathcal{P}}(h) = \hat{\mathcal{L}}_t(h)$ . Applying Theorem 4 on  $h_{t-1}$  with the loss function  $\varphi$  gives us w.p.  $1 - \delta$ ,

$$\mathcal{L}(h_{t-1}) - \mathcal{L}(h^*) \leq (1 + \epsilon) \left( \tilde{\mathcal{L}}_t(h_{t-1}) - \tilde{\mathcal{L}}_t(h^*) \right) + \frac{C_\delta}{\epsilon \sigma (t-1)}$$

which, upon summing across time steps and taking a union bound, gives us with probability at least  $1 - \delta$ ,

$$\begin{aligned} \frac{1}{n-1} \sum_{t=2}^n \mathcal{L}(h_{t-1}) &\leq \mathcal{L}(h^*) + \frac{C_{(\delta/n)} \log n}{\epsilon \sigma (n-1)} \\ &+ \frac{1+\epsilon}{n-1} \sum_{t=2}^n \left( \tilde{\mathcal{L}}_t(h_{t-1}) - \tilde{\mathcal{L}}_t(h^*) \right). \end{aligned}$$

Let  $\xi_t := \left( \tilde{\mathcal{L}}_t(h_{t-1}) - \tilde{\mathcal{L}}_t(h^*) \right) - \left( \hat{\mathcal{L}}_t(h_{t-1}) - \hat{\mathcal{L}}_t(h^*) \right)$ . Then using the regret bound  $\mathfrak{R}_n$  we can write,

$$\begin{aligned} \frac{1}{n-1} \sum_{t=2}^n \mathcal{L}(h_{t-1}) &\leq \mathcal{L}(h^*) + \frac{1+\epsilon}{n-1} \left( \mathfrak{R}_n + \sum_{t=2}^n \xi_t \right) \\ &+ \frac{C_{(\delta/n)} \log n}{\epsilon \sigma (n-1)}. \end{aligned}$$

We now use Bernstein type inequalities to bound the sum  $\sum_{t=2}^n \xi_t$  using a proof technique used in (Kakade & Tewari, 2008; Cesa-Bianchi & Gentile, 2008). We first note some properties of the sequence below.

**Lemma 15.** *The sequence  $\xi_2, \dots, \xi_n$  is a bounded martingale difference sequence with bounded conditional variance.*

*Proof.* That  $\xi_t$  is a martingale difference sequence follows by construction: we can decompose the term  $\xi_t = \phi_t - \psi_t$  where  $\phi_t = \tilde{\mathcal{L}}_t(h_{t-1}) - \hat{\mathcal{L}}_t(h_{t-1})$  and  $\psi_t = \tilde{\mathcal{L}}_t(h^*) - \hat{\mathcal{L}}_t(h^*)$ , both of which are martingale difference sequences with respect to the common filtration  $\mathcal{F} = \{\mathcal{F}_n : n = 0, 1, \dots\}$  where  $\mathcal{F}_n = \sigma(\mathbf{z}_i : i = 1, \dots, n)$ .

Since the loss function takes values in  $[0, B]$ , we have  $|\xi_t| \leq 2B$  which proves that our sequence is bounded.

To prove variance bounds for the sequence, we first use the Lipschitz properties of the loss function to get

$$\begin{aligned} \xi_t &= \left( \tilde{\mathcal{L}}_t(h_{t-1}) - \tilde{\mathcal{L}}_t(h^*) \right) - \left( \hat{\mathcal{L}}_t(h_{t-1}) - \hat{\mathcal{L}}_t(h^*) \right) \\ &\leq 2L \|h_{t-1} - h^*\|. \end{aligned}$$

Recall that the hypothesis space is embedded in a Banach space equipped with the norm  $\|\cdot\|$ . Thus we have  $\mathbb{E}[\xi_t^2 | \mathcal{F}_{t-1}] \leq 4L^2 \|h_{t-1} - h^*\|^2$ . Now using  $\sigma$ -strong convexity of the loss function we have

$$\begin{aligned} \frac{\mathcal{L}(h_{t-1}) + \mathcal{L}(h^*)}{2} &\geq \mathcal{L}\left(\frac{h_{t-1} + h^*}{2}\right) + \frac{\sigma}{8} \|h_{t-1} - h^*\|^2 \\ &\geq \mathcal{L}(h^*) + \frac{\sigma}{8} \|h_{t-1} - h^*\|^2. \end{aligned}$$

Let  $\sigma_t^2 := \frac{16L^2}{\sigma} (\mathcal{L}(h_{t-1}) - \mathcal{L}(h^*))$ . Combining the two inequalities we get  $\mathbb{E}[\xi_t^2 | \mathcal{F}_{t-1}] \leq \sigma_t^2$ .  $\square$

We note that although (Kakade & Tewari, 2008) state their result with a requirement that the loss function be strongly convex in a point wise manner, i.e., for all  $\mathbf{z}, \mathbf{z}' \in \mathcal{Z}$ , the function  $\ell(h, \mathbf{z}, \mathbf{z}')$  be strongly convex in  $h$ , they only require the result in expectation. More specifically, our notion of strong convexity where we require the population risk functional  $\mathcal{L}(h)$  to be strongly convex actually suits the proof of (Kakade & Tewari, 2008) as well.

We now use a Bernstein type inequality for martingales proved in (Kakade & Tewari, 2008). The proof is based on a fundamental result on martingale convergence due to Freedman (1975).

**Theorem 16.** *Given a martingale difference sequence  $X_t, t = 1 \dots n$  that is uniformly  $B$ -bounded and has conditional variance  $\mathbb{E}[X_t^2 | X_1, \dots, X_{t-1}] \leq \sigma_t^2$ , we have for any  $\delta < 1/e$  and  $n \geq 3$ , with probability at least  $1 - \delta$ ,*

$$\sum_{t=1}^n X_t \leq \max \left\{ 2\sigma^*, 3B\sqrt{\log \frac{4 \log n}{\delta}} \right\} \sqrt{\log \frac{4 \log n}{\delta}},$$

where  $\sigma^* = \sqrt{\sum_{t=1}^n \sigma_t^2}$ .

Let  $\mathfrak{D}_n = \sum_{t=2}^n (\mathcal{L}(h_{t-1}) - \mathcal{L}(h^*))$ . Then we can write the variance bound as

$$\begin{aligned} \sigma^* &= \sqrt{\sum_{t=1}^n \sigma_t^2} = \sqrt{\sum_{t=1}^n \frac{16L^2}{\sigma} (\mathcal{L}(h_{t-1}) - \mathcal{L}(h^*))} \\ &= 4L\sqrt{\frac{\mathfrak{D}_n}{\sigma}}. \end{aligned}$$

Thus, with probability at least  $1 - \delta$ , we have

$$\sum_{t=1}^n \xi_t \leq \max \left\{ 8L\sqrt{\frac{\mathfrak{D}_n}{\sigma}}, 6B\sqrt{\log \frac{4 \log n}{\delta}} \right\} \sqrt{\log \frac{4 \log n}{\delta}}.$$

Denoting  $\Delta = \sqrt{\log \frac{4 \log n}{\delta}}$  for notational simplicity and using the above bound in the online to batch conversion bound gives us

$$\begin{aligned} \frac{\mathfrak{D}_n}{n-1} &\leq \frac{1+\epsilon}{n-1} \left( \mathfrak{R}_n + \max \left\{ 8L\sqrt{\frac{\mathfrak{D}_n}{\sigma}}, 6B\Delta \right\} \Delta \right) \\ &\quad + \frac{C_{(\delta/n)} \log n}{\epsilon \sigma (n-1)}. \end{aligned}$$

Solving this quadratic inequality is simplified by a useful result given in (Kakade & Tewari, 2008, Lemma 4)

**Lemma 17.** *For any  $s, r, d, b, \Delta > 0$  such that*

$$s \leq r + \max \left\{ 4\sqrt{ds}, 6b\Delta \right\} \Delta,$$

*we also have*

$$s \leq r + 4\sqrt{dr}\Delta + \max \{16d, 6b\} \Delta^2.$$

Using this result gives us a rather nasty looking expression which we simplify by absorbing constants inside the  $\mathcal{O}(\cdot)$  notation. We also make a simplifying ad-hoc assumption that we shall only set  $\epsilon \in (0, 1]$ . The resulting expression is given below:

$$\begin{aligned} \mathfrak{D}_n &\leq (1+\epsilon) \mathfrak{R}_n + \mathcal{O} \left( \frac{C_d^2 \log n \log(n/\delta)}{\epsilon} + \log \frac{\log n}{\delta} \right) \\ &\quad + \mathcal{O} \left( \sqrt{\left( \mathfrak{R}_n + \frac{C_d^2 \log n \log(n/\delta)}{\epsilon} \right) \log \frac{\log n}{\delta}} \right). \end{aligned}$$

Let  $\mathfrak{V}_n = \max \{ \mathfrak{R}_n, 2C_d^2 \log n \log(n/\delta) \}$ . Concentrating only on the portion of the expression involving  $\epsilon$  and ignoring the constants, we get

$$\begin{aligned} &\epsilon \mathfrak{R}_n + \frac{C_d^2 \log n \log(n/\delta)}{\epsilon} + \sqrt{\frac{C_d^2 \log n \log(n/\delta)}{\epsilon} \log \frac{\log n}{\delta}} \\ &\leq \epsilon \mathfrak{R}_n + \frac{2C_d^2 \log n \log(n/\delta)}{\epsilon} \leq \epsilon \mathfrak{V}_n + \frac{2C_d^2 \log n \log(n/\delta)}{\epsilon} \\ &\leq 2C_d \sqrt{2\mathfrak{V}_n \log n \log(n/\delta)}, \end{aligned}$$

where the second step follows since  $\epsilon \leq 1$  and the fourth step follows by using  $\epsilon = \sqrt{\frac{2C_d^2 \log n \log(n/\delta)}{\mathfrak{V}_n}} \leq 1$ . Putting this into the excess risk expression gives us

$$\begin{aligned} \frac{1}{n-1} \sum_{t=2}^n \mathcal{L}(h_{t-1}) &\leq \mathcal{L}(h^*) + \frac{\mathfrak{R}_n}{n-1} \\ &\quad + C_d \cdot \mathcal{O} \left( \frac{\sqrt{\mathfrak{V}_n \log n \log(n/\delta)}}{n-1} \right) \end{aligned}$$

which finishes the proof.  $\square$

## D. Generalization Bounds for Finite Buffer Algorithms

In this section we present online to batch conversion bounds for learning algorithms that work with finite buffers and are able to provide regret bounds  $\mathfrak{R}_n^{\text{buf}}$  with respect to *finite-buffer* loss functions  $\hat{\mathcal{L}}_t^{\text{buf}}$ .

Although due to lack of space, Theorem 6 presents these bounds for bounded as well as strongly convex functions together, we prove them separately for sake of clarity. Moreover, the techniques used to prove these two results are fairly different which further motivates this. Before we begin, we present the problem setup formally and introduce necessary notation.

In our finite buffer online learning model, one observes a stream of elements  $\mathbf{z}_1, \dots, \mathbf{z}_n$ . A *sketch* of these elements is maintained in a buffer  $B$  of size  $s$ , i.e., at each step  $t = 2, \dots, n$ , the buffer contains a subset of the elements  $Z^{t-1}$  of size at most  $s$ . At each step  $t = 2 \dots n$ , the online learning algorithm posits a hypothesis  $h_{t-1} \in \mathcal{H}$ , upon which the element  $\mathbf{z}_t$  is revealed and the algorithm incurs the loss

$$\hat{\mathcal{L}}_t^{\text{buf}}(h_{t-1}) = \frac{1}{|B_t|} \sum_{\mathbf{z} \in B_t} \ell(h_{t-1}, \mathbf{z}_t, \mathbf{z}),$$

where  $B_t$  is the state of the buffer at time  $t$ . Note that  $|B_t| \leq s$ . We would be interested in algorithms that are able to give a *finite-buffer* regret bound, i.e., for which, the proposed ensemble  $h_1, \dots, h_{n-1}$  satisfies

$$\sum_{t=2}^n \hat{\mathcal{L}}_t^{\text{buf}}(h_{t-1}) - \inf_{h \in \mathcal{H}} \sum_{t=2}^n \hat{\mathcal{L}}_t^{\text{buf}}(h) \leq \mathfrak{R}_n^{\text{buf}}.$$

We assume that the buffer is updated after each step in a *stream-oblivious* manner. For randomized buffer update policies (such as reservoir sampling (Vitter, 1985)), we assume that we are supplied at each step with some fresh randomness  $r_t$  (see examples below) along with the data point  $\mathbf{z}_t$ . Thus the data received at time  $t$  is a tuple  $\mathbf{w}_t = (\mathbf{z}_t, r_t)$ . We shall refer to

the random variables  $r_t$  as *auxiliary* variables. It is important to note that stream obliviousness dictates that  $r_t$  as a random variable is independent of  $\mathbf{z}_t$ . Let  $W^{t-1} := \{\mathbf{w}_1, \dots, \mathbf{w}_{t-1}\}$  and  $R^{t-1} := \{r_1, \dots, r_{t-1}\}$ . Note that  $R^{t-1}$  completely decides the indices present in the buffer  $B_t$  at step  $t$  independent of  $Z^{t-1}$ . For any  $h \in \mathcal{H}$ , define

$$\tilde{\mathcal{L}}_t^{\text{buf}} := \mathbb{E}_{\mathbf{z}_t} \left[ \hat{\mathcal{L}}_t^{\text{buf}} \mid W^{t-1} \right].$$

### D.1. Examples of Stream Oblivious Policies

Below we give some examples of stream oblivious policies for updating the buffer:

1. **FIFO**: in this policy, the data point  $\mathbf{z}_t$  arriving at time  $t > s$  is inducted into the buffer by evicting the data point  $\mathbf{z}_{(t-s)}$  from the buffer. Since this is a non-randomized policy, there is no need for auxiliary randomness and we can assume that  $r_t$  follows the trivial law  $r_t \sim \mathbb{1}_{\{r=1\}}$ .
2. **RS** : the Reservoir Sampling policy was introduced by Vitter (1985). In this policy, at time  $t > s$ , the incoming data point  $\mathbf{z}_t$  is inducted into the buffer with probability  $s/t$ . If chosen to be inducted, it results in the eviction of a random element of the buffer. In this case the auxiliary random variable is 2-tuple that follows the law

$$r_t = (r_t^1, r_t^2) \sim \left( \text{Bernoulli} \left( \frac{s}{t} \right), \frac{1}{s} \sum_{i=1}^s \mathbb{1}_{\{r_2=i\}} \right).$$

3. **RS-x** (see Algorithm 1): in this policy, the incoming data point  $\mathbf{z}_t$  at time  $t > s$ , replaces each data point in the buffer independently with probability  $1/t$ . Thus the incoming point has the potential to evict multiple buffer points while establishing multiple copies of itself in the buffer. In this case, the auxiliary random variable is defined by a Bernoulli process:  $r_t = (r_t^1, r_t^2, \dots, r_t^s) \sim (\text{Bernoulli}(\frac{1}{t}), \text{Bernoulli}(\frac{1}{t}), \dots, \text{Bernoulli}(\frac{1}{t}))$ .
4. **RS-x<sup>2</sup>** (see Algorithm 3): this is a variant of **RS-x** in which the number of evictions is first decided by a Binomial trial and then those many random points in the buffer are replaced by the incoming data point. This can be implemented as follows:  $r_t = (r_t^1, r_t^2) \sim (\text{Binomial}(s, \frac{1}{t}), \text{Perm}(s))$  where  $\text{Perm}(s)$  gives a random permutation of  $s$  elements.

### D.2. Finite Buffer Algorithms with Bounded Loss Functions

We shall prove the result in two steps. In the first step we shall prove the following uniform convergence style

result

**Lemma 18.** *Let  $h_1, \dots, h_{n-1}$  be an ensemble of hypotheses generated by an online learning algorithm working with a  $B$ -bounded loss function  $\ell$  and a finite buffer of capacity  $s$ . Then for any  $\delta > 0$ , we have with probability at least  $1 - \delta$ ,*

$$\begin{aligned} \frac{1}{n-1} \sum_{t=2}^n \mathcal{L}(h_{t-1}) &\leq \frac{1}{n-1} \sum_{t=2}^n \hat{\mathcal{L}}_t^{\text{buf}}(h_{t-1}) + B \sqrt{\frac{2 \log \frac{n}{\delta}}{s}} \\ &\quad + \frac{2}{n-1} \sum_{t=2}^n \mathcal{R}_{\min\{t-1, s\}}(\ell \circ \mathcal{H}). \end{aligned}$$

At a high level, our proof progression shall follow that of Lemma 1. However, the execution of the proof will have to be different in order to accommodate the finiteness of the buffer and randomness used to construct it. Similarly, we shall also be able to show the following result.

**Lemma 19.** *For any  $\delta > 0$ , we have with probability at least  $1 - \delta$ ,*

$$\begin{aligned} \frac{1}{n-1} \sum_{t=2}^n \hat{\mathcal{L}}_t^{\text{buf}}(h^*) &\leq \mathcal{L}(h^*) + 3B \sqrt{\frac{\log \frac{n}{\delta}}{s}} \\ &\quad + \frac{2}{n-1} \sum_{t=2}^n \mathcal{R}_{\min\{t-1, s\}}(\ell \circ \mathcal{H}). \end{aligned}$$

Note that for classes whose Rademacher averages behave as  $\mathcal{R}_n(\mathcal{H}) \leq C_d \cdot \mathcal{O}\left(\frac{1}{\sqrt{n}}\right)$ , applying Lemma 7 gives us  $\mathcal{R}_n(\ell \circ \mathcal{H}) \leq C_d \cdot \mathcal{O}\left(\frac{1}{\sqrt{n}}\right)$  as well which allows us to show

$$\frac{2}{n-1} \sum_{t=2}^n \mathcal{R}_{\min\{t-1, s\}}(\ell \circ \mathcal{H}) = C_d \cdot \mathcal{O}\left(\frac{1}{\sqrt{s}}\right).$$

Combining Lemmata 18 and 19 along with the definition of bounded buffer regret  $\mathfrak{R}_n^{\text{buf}}$  gives us the first part of Theorem 6. We prove Lemma 18 below:

*Proof (of Lemma 18).* We first decompose the excess risk term as before

$$\begin{aligned} &\sum_{t=2}^n \mathcal{L}(h_{t-1}) - \hat{\mathcal{L}}_t^{\text{buf}}(h_{t-1}) \\ &= \sum_{t=2}^n \underbrace{\mathcal{L}(h_{t-1}) - \tilde{\mathcal{L}}_t^{\text{buf}}(h_{t-1})}_{P_t} + \underbrace{\tilde{\mathcal{L}}_t^{\text{buf}}(h_{t-1}) - \hat{\mathcal{L}}_t^{\text{buf}}(h_{t-1})}_{Q_t}. \end{aligned}$$

By construction, the sequence  $Q_t$  forms a martingale difference sequence, i.e.,  $\mathbb{E}[Q_t | \mathcal{Z}^{t-1}] = 0$  and hence

by an application of Azuma Hoeffding inequality we have

$$\frac{1}{n-1} \sum_{t=2}^n Q_t \leq B \sqrt{\frac{2 \log \frac{1}{\delta}}{n-1}}. \quad (7)$$

We now analyze each term  $P_t$  individually. To simplify the analysis a bit we assume that the buffer update policy keeps admitting points into the buffer as long as there is space so that for  $t \leq s+1$ , the buffer contains an exact copy of the preceding stream. This is a very natural assumption satisfied by FIFO as well as reservoir sampling. We stress that our analysis works even without this assumption but requires a bit more work. In case we do make this assumption, the analysis of Lemma 1 applies directly and we have, for any  $t \leq s+1$ , with probability at least  $1 - \delta$ ,

$$P_t \leq \mathcal{R}_{t-1}(\ell \circ \mathcal{H}) + B \sqrt{\frac{\log \frac{1}{\delta}}{2(t-1)}}$$

For  $t > s+1$ , for an independent ghost sample  $\{\tilde{\mathbf{w}}_1, \dots, \tilde{\mathbf{w}}_{t-1}\}$  we have,

$$\begin{aligned} \mathbb{E}_{\tilde{\mathbf{W}}^{t-1}} [\tilde{\mathcal{L}}_t^{\text{buf}}] &= \mathbb{E}_{\tilde{\mathbf{W}}^{t-1}} \left[ \frac{1}{s} \sum_{\tilde{\mathbf{z}} \in \tilde{B}_t} \mathbb{E}_{\mathbf{z}} [\ell(h_{t-1}, \mathbf{z}, \tilde{\mathbf{z}})] \right] \\ &= \mathbb{E}_{\tilde{R}^{t-1}} \left[ \mathbb{E}_{\tilde{Z}^{t-1}} \left[ \frac{1}{s} \sum_{\tilde{\mathbf{z}} \in \tilde{B}_t} \mathbb{E}_{\mathbf{z}} [\ell(h_{t-1}, \mathbf{z}, \tilde{\mathbf{z}})] \mid \tilde{R}^{t-1} \right] \right]. \end{aligned}$$

The conditioning performed above is made possible by stream obliviousness. Now suppose that given  $\tilde{R}^{t-1}$  the indices  $\tilde{\tau}_1, \dots, \tilde{\tau}_s$  are present in the buffer  $\tilde{B}_t$  at time  $t$ . Recall that this choice of indices is independent of  $\tilde{Z}^{t-1}$  because of stream obliviousness. Then we can write the above as

$$\begin{aligned} &\mathbb{E}_{\tilde{R}^{t-1}} \left[ \mathbb{E}_{\tilde{Z}^{t-1}} \left[ \frac{1}{s} \sum_{\tilde{\mathbf{z}} \in \tilde{B}_t} \mathbb{E}_{\mathbf{z}} [\ell(h_{t-1}, \mathbf{z}, \tilde{\mathbf{z}})] \mid \tilde{R}^{t-1} \right] \right] \\ &= \mathbb{E}_{\tilde{R}^{t-1}} \left[ \mathbb{E}_{\tilde{Z}^{t-1}} \left[ \frac{1}{s} \sum_{j=1}^s \mathbb{E}_{\mathbf{z}} [\ell(h_{t-1}, \mathbf{z}, \tilde{\mathbf{z}}_{\tilde{\tau}_j})] \right] \right] \\ &= \mathbb{E}_{\tilde{R}^{t-1}} \left[ \mathbb{E}_{\tilde{\mathbf{z}}_1, \dots, \tilde{\mathbf{z}}_s} \left[ \frac{1}{s} \sum_{j=1}^s \mathbb{E}_{\mathbf{z}} [\ell(h_{t-1}, \mathbf{z}, \tilde{\mathbf{z}}_j)] \right] \right] \\ &= \mathbb{E}_{\tilde{R}^{t-1}} [\mathcal{L}(h_{t-1})] = \mathcal{L}(h_{t-1}). \end{aligned}$$

We thus have

$$\mathbb{E}_{\tilde{\mathbf{W}}^{t-1}} \left[ \frac{1}{s} \sum_{\tilde{\mathbf{z}} \in \tilde{B}_t} \mathbb{E}_{\mathbf{z}} [\ell(h_{t-1}, \mathbf{z}, \tilde{\mathbf{z}})] \right] = \mathcal{L}(h_{t-1}). \quad (8)$$

We now upper bound  $P_t$  as

$$\begin{aligned} P_t &= \mathcal{L}(h_{t-1}) - \tilde{\mathcal{L}}_t^{\text{buf}}(h_{t-1}) \\ &= \mathbb{E}_{\tilde{W}^{t-1}} \left[ \frac{1}{s} \sum_{\tilde{\mathbf{z}} \in \tilde{B}_t} \mathbb{E}_{\mathbf{z}} [\ell(h_{t-1}, \mathbf{z}, \tilde{\mathbf{z}})] \right] - \tilde{\mathcal{L}}_t^{\text{buf}}(h_{t-1}) \\ &\leq \underbrace{\sup_{h \in \mathcal{H}} \left[ \mathbb{E}_{\tilde{W}^{t-1}} \left[ \frac{1}{s} \sum_{\tilde{\mathbf{z}} \in \tilde{B}_t} \mathbb{E}_{\mathbf{z}} [\ell(h, \mathbf{z}, \tilde{\mathbf{z}})] \right] - \tilde{\mathcal{L}}_t^{\text{buf}}(h) \right]}_{g_t(\mathbf{w}_1, \dots, \mathbf{w}_{t-1})}. \end{aligned}$$

Now it turns out that applying McDiarmid's inequality to  $g_t(\mathbf{w}_1, \dots, \mathbf{w}_{t-1})$  directly would yield a very loose bound. This is because of the following reason: since  $\tilde{\mathcal{L}}_t^{\text{buf}}(h) = \frac{1}{|\tilde{B}_t|} \sum_{\mathbf{z} \in \tilde{B}_t} \ell(h, \mathbf{z}, \mathbf{z})$  depends only on  $s$  data points, changing any one of the  $(t-1)$  variables  $\mathbf{w}_i$  brings about a perturbation in  $g_t$  of magnitude at most  $\mathcal{O}(1/s)$ . The problem is that  $g_t$  is a function of  $(t-1) \gg s$  variables and hence a direct application of McDiarmid's inequality would yield an excess error term of  $\sqrt{\frac{t \log(1/\delta)}{s^2}}$  which would in the end require  $s = \omega(\sqrt{n})$  to give any non trivial generalization bounds. In contrast, we wish to give results that would give non trivial bounds for  $s = \tilde{\omega}(1)$ .

In order to get around this problem, we need to reduce the number of variables in the statistic while applying McDiarmid's inequality. Fortunately, we observe that  $g_t$  *effectively* depends only on  $s$  variables, the data points that end up in the buffer at time  $t$ . This allows us to do the following. For any  $R^{t-1}$ , define

$$\delta(R^{t-1}) := \mathbb{P}_{Z^{t-1}} [g_t(\mathbf{w}_1, \dots, \mathbf{w}_{t-1}) > \epsilon | R^{t-1}].$$

We will first bound  $\delta(R^{t-1})$ . This will allow us to show

$$\mathbb{P}_{W^{t-1}} [g_t(\mathbf{w}_1, \dots, \mathbf{w}_{t-1}) > \epsilon] \leq \mathbb{E}_{R^{t-1}} [\delta(R^{t-1})],$$

where we take expectation over the distribution on  $R^{t-1}$  induced by the buffer update policy. Note that since we are oblivious to the nature of the distribution over  $R^{t-1}$ , our proof works for any stream oblivious buffer update policy. Suppose that given  $R^{t-1}$  the indices  $\tau_1, \dots, \tau_s$  are present in the buffer  $B_t$  at time  $t$ . Then we have

$$\begin{aligned} &g_t(\mathbf{w}_1, \dots, \mathbf{w}_{t-1}; R^{t-1}) \\ &= \sup_{h \in \mathcal{H}} \left[ \mathbb{E}_{\tilde{W}^{t-1}} \left[ \frac{1}{s} \sum_{\tilde{\mathbf{z}} \in \tilde{B}_t} \mathbb{E}_{\mathbf{z}} [\ell(h, \mathbf{z}, \tilde{\mathbf{z}})] \right] - \frac{1}{s} \sum_{j=1}^s \mathbb{E}_{\mathbf{z}} [\ell(h, \mathbf{z}, \mathbf{z}_{\tau_j})] \right] \\ &=: \tilde{g}_t(\mathbf{z}_{\tau_1}, \dots, \mathbf{z}_{\tau_s}). \end{aligned}$$

The function  $\tilde{g}_t$  can be perturbed at most  $B/s$  due to a change in one of  $\mathbf{z}_{\tau_j}$ . Applying McDiarmid's inequality

to the function  $\tilde{g}_t$  we get with probability at least  $1 - \delta$ ,

$$\tilde{g}_t(\mathbf{z}_{\tau_1}, \dots, \mathbf{z}_{\tau_s}) \leq \mathbb{E}_{Z^{t-1}} [\tilde{g}_t(\mathbf{z}_{\tau_1}, \dots, \mathbf{z}_{\tau_s})] + B \sqrt{\frac{\log \frac{1}{\delta}}{2s}}$$

We analyze  $\mathbb{E}_{Z^{t-1}} [\tilde{g}_t(\mathbf{z}_{\tau_1}, \dots, \mathbf{z}_{\tau_s})]$  in Figure 2. In the third step in the calculations we symmetrize the true random variable  $\mathbf{z}_{\tau_j}$  with the ghost random variable  $\tilde{\mathbf{z}}_{\tau_j}$ . This is contrasted with traditional symmetrization where we would symmetrize  $\mathbf{z}_i$  with  $\tilde{\mathbf{z}}_i$ . In our case, we let the buffer construction dictate the matching at the symmetrization step. Thus we get, with probability at least  $1 - \delta$  over  $\mathbf{z}_1, \dots, \mathbf{z}_{t-1}$ ,

$$g_t(\mathbf{w}_1, \dots, \mathbf{w}_{t-1}; R^{t-1}) \leq 2\mathcal{R}_s(\ell \circ \mathcal{H}) + B \sqrt{\frac{\log \frac{1}{\delta}}{2s}}$$

which in turn, upon taking expectations with respect to  $R^{t-1}$ , gives us with probability at least  $1 - \delta$  over  $\mathbf{w}_1, \dots, \mathbf{w}_{t-1}$ ,

$$P_t = g_t(\mathbf{w}_1, \dots, \mathbf{w}_{t-1}) \leq 2\mathcal{R}_s(\ell \circ \mathcal{H}) + B \sqrt{\frac{\log \frac{1}{\delta}}{2s}}.$$

Applying a union bound on the bounds for  $P_t, t = 2, \dots, n$  gives us with probability at least  $1 - \delta$ ,

$$\begin{aligned} \frac{1}{n-1} \sum_{t=2}^n P_t &\leq \frac{2}{n-1} \sum_{t=2}^n \mathcal{R}_{\min\{t-1, s\}}(\ell \circ \mathcal{H}) \\ &\quad + B \sqrt{\frac{\log \frac{n}{\delta}}{2s}}. \end{aligned} \quad (9)$$

Adding Equations (7) and (9) gives us the result.  $\square$

### D.3. Finite Buffer Algorithms with Strongly Convex Loss Functions

In this section we prove faster convergence bounds for algorithms that offer *finite-buffer* regret bounds and use strongly convex loss functions. Given the development of the method of decoupling training and auxiliary random variables in the last section, we can proceed with the proof right away.

Our task here is to prove bounds on the following quantity

$$\frac{1}{n-1} \sum_{t=2}^n \mathcal{L}(h_{t-1}) - \mathcal{L}(h^*).$$

Proceeding as before, we will first prove the following result

$$\mathbb{P}_{Z^n} \left[ \frac{1}{n-1} \sum_{t=2}^n \mathcal{L}(h_{t-1}) - \mathcal{L}(h^*) > \epsilon \mid R^n \right] \leq \delta. \quad (10)$$

$$\begin{aligned}
 \mathbb{E}_{Z^{t-1}} [\tilde{g}_t(\mathbf{z}_{\tau_1}, \dots, \mathbf{z}_{\tau_s})] &= \mathbb{E}_{Z^{t-1}} \left[ \sup_{h \in \mathcal{H}} \left[ \mathbb{E}_{\tilde{W}^{t-1}} \left[ \frac{1}{s} \sum_{\mathbf{z} \in \tilde{B}_t} \mathbb{E} [\ell(h, \mathbf{z}, \tilde{\mathbf{z}})] \right] - \frac{1}{s} \sum_{j=1}^s \mathbb{E}_{\mathbf{z}} [\ell(h, \mathbf{z}, \mathbf{z}_{\tau_j})] \right] \right] \\
 &\leq \mathbb{E}_{\tilde{R}^{t-1}} \left[ \mathbb{E}_{Z^{t-1}, \tilde{Z}^{t-1}} \left[ \sup_{h \in \mathcal{H}} \left[ \frac{1}{s} \sum_{j=1}^s \mathbb{E}_{\mathbf{z}} [\ell(h, \mathbf{z}, \tilde{\mathbf{z}}_{\tau_j})] - \frac{1}{s} \sum_{j=1}^s \mathbb{E}_{\mathbf{z}} [\ell(h, \mathbf{z}, \mathbf{z}_{\tau_j})] \right] \right] \right] \tilde{R}^{t-1} \\
 &= \mathbb{E}_{\tilde{R}^{t-1}} \left[ \mathbb{E}_{Z^{t-1}, \tilde{Z}^{t-1}, \epsilon_j} \left[ \sup_{h \in \mathcal{H}} \left[ \frac{1}{s} \sum_{j=1}^s \epsilon_j \left( \mathbb{E}_{\mathbf{z}} [\ell(h, \mathbf{z}, \tilde{\mathbf{z}}_{\tau_j})] - \mathbb{E}_{\mathbf{z}} [\ell(h, \mathbf{z}, \mathbf{z}_{\tau_j})] \right) \right] \right] \right] \tilde{R}^{t-1} \\
 &\leq 2 \mathbb{E}_{\tilde{R}^{t-1}} \left[ \mathbb{E}_{Z^{t-1}, \epsilon_j} \left[ \sup_{h \in \mathcal{H}} \left[ \frac{1}{s} \sum_{j=1}^s \epsilon_j \mathbb{E}_{\mathbf{z}} [\ell(h, \mathbf{z}, \mathbf{z}_{\tau_j})] \right] \right] \right] \tilde{R}^{t-1} \\
 &\leq 2 \mathbb{E}_{\tilde{R}^{t-1}} [\mathcal{R}_s(\ell \circ \mathcal{H})] \leq 2\mathcal{R}_s(\ell \circ \mathcal{H}).
 \end{aligned}$$

Figure 2. Decoupling training and auxiliary variables for Rademacher complexity-based analysis.

This will allow us, upon taking expectations over  $R^n$ , show the following

$$\mathbb{P}_{W^n} \left[ \frac{1}{n-1} \sum_{t=2}^n \mathcal{L}(h_{t-1}) - \mathcal{L}(h^*) > \epsilon \right] \leq \delta,$$

which shall complete the proof.

In order to prove the statement given in Equation (10), we will use Theorem 4. As we did in the case of all-pairs loss functions, consider the loss function  $\wp(h, \mathbf{z}') := \mathbb{E}_{\mathbf{z}} [\ell(h, \mathbf{z}, \mathbf{z}')] with  $\mathcal{P}$  and  $\hat{\mathcal{P}}$  as the associated population and empirical risk functionals. Clearly, if  $\ell$  is  $L$ -Lipschitz and  $\sigma$ -strongly convex then so is  $\wp$ . By linearity of expectation, for any  $h \in \mathcal{H}$ ,  $\mathcal{P}(h) = \mathcal{L}(h)$ . Suppose that given  $R^{t-1}$  the indices  $\tau_1, \dots, \tau_s$  are present in the buffer  $B_t$  at time  $t$ . Applying Theorem 4 on  $h_{t-1}$  at the  $t^{\text{th}}$  step with the loss function  $\wp$  gives us that given  $R^{t-1}$ , with probability at least  $1 - \delta$  over the choice of  $Z^{t-1}$ ,$

$$\begin{aligned}
 \mathcal{L}(h_{t-1}) - \mathcal{L}(h^*) &\leq (1 + \epsilon) \left( \tilde{\mathcal{L}}_t^{\text{buf}}(h_{t-1}) - \tilde{\mathcal{L}}_t^{\text{buf}}(h^*) \right) \\
 &\quad + \frac{C_\delta}{\epsilon \sigma (\min \{s, t-1\})},
 \end{aligned}$$

where we have again made the simplifying (yet optional) assumption that prior to time  $t = s + 1$ , the buffer contains an exact copy of the stream. Summing across time steps and taking a union bound, gives us that given  $R^n$ , with probability at least  $1 - \delta$  over the choice of  $Z^n$ ,

$$\begin{aligned}
 \frac{1}{n-1} \sum_{t=2}^n \mathcal{L}(h_{t-1}) &\leq \mathcal{L}(h^*) + \frac{C_{(\delta/n)}}{\epsilon \sigma} \left( \frac{\log 2s}{n-1} + \frac{1}{s} \right) \\
 &\quad + \frac{1 + \epsilon}{n-1} \sum_{t=2}^n \tilde{\mathcal{L}}_t^{\text{buf}}(h_{t-1}) - \tilde{\mathcal{L}}_t^{\text{buf}}(h^*).
 \end{aligned}$$

Let us define as before

$$\xi_t := \left( \tilde{\mathcal{L}}_t^{\text{buf}}(h_{t-1}) - \tilde{\mathcal{L}}_t^{\text{buf}}(h^*) \right) - \left( \hat{\mathcal{L}}_t^{\text{buf}}(h_{t-1}) - \hat{\mathcal{L}}_t^{\text{buf}}(h^*) \right).$$

Then using the regret bound  $\mathfrak{R}_n^{\text{buf}}$  we can write,

$$\begin{aligned}
 \frac{1}{n-1} \sum_{t=2}^n \mathcal{L}(h_{t-1}) &\leq \mathcal{L}(h^*) + \frac{1 + \epsilon}{n-1} \left( \mathfrak{R}_n^{\text{buf}} + \sum_{t=2}^n \xi_t \right) \\
 &\quad + \frac{C_{(\delta/n)}}{\epsilon \sigma} \left( \frac{\log 2s}{n-1} + \frac{1}{s} \right).
 \end{aligned}$$

Assuming  $s < n / \log n$  simplifies the above expression to the following:

$$\begin{aligned}
 \frac{1}{n-1} \sum_{t=2}^n \mathcal{L}(h_{t-1}) &\leq \mathcal{L}(h^*) + \frac{1 + \epsilon}{n-1} \left( \mathfrak{R}_n^{\text{buf}} + \sum_{t=2}^n \xi_t \right) \\
 &\quad + \frac{2C_{(\delta/n)}}{\epsilon \sigma s}.
 \end{aligned}$$

Note that this assumption is neither crucial to our proof nor very harsh as for  $s = \Omega(n)$ , we can always apply the results from the *infinite-buffer* setting using Theorem 5. Moving forward, by using the Bernstein-style inequality from (Kakade & Tewari, 2008), one can show with that probability at least  $1 - \delta$ , we have

$$\sum_{t=1}^n \xi_t \leq \max \left\{ 8L \sqrt{\frac{\mathfrak{D}_n}{\sigma}}, 6B \sqrt{\log \frac{4 \log n}{\delta}} \right\} \sqrt{\log \frac{4 \log n}{\delta}},$$

where  $\mathfrak{D}_n = \sum_{t=2}^n (\mathcal{L}(h_{t-1}) - \mathcal{L}(h^*))$ . This gives us

$$\begin{aligned}
 \frac{\mathfrak{D}_n}{n-1} &\leq \frac{1 + \epsilon}{n-1} \left( \mathfrak{R}_n^{\text{buf}} + \max \left\{ 8L \sqrt{\frac{\mathfrak{D}_n}{\sigma}}, 6B \Delta \right\} \Delta \right) \\
 &\quad + \frac{2C_{(\delta/n)}}{\epsilon \sigma s}.
 \end{aligned}$$

Using (Kakade & Tewari, 2008, Lemma 4) and absorbing constants inside the  $\mathcal{O}(\cdot)$  notation we get:

$$\begin{aligned} \mathfrak{D}_n &\leq (1 + \epsilon) \mathfrak{R}_n^{\text{buf}} + \mathcal{O}\left(\frac{C_d^2 n \log(n/\delta)}{\epsilon s} + \log \frac{\log n}{\delta}\right) \\ &\quad + \mathcal{O}\left(\sqrt{\left(\mathfrak{R}_n^{\text{buf}} + \frac{C_d^2 n \log(n/\delta)}{\epsilon s}\right) \log \frac{\log n}{\delta}}\right). \end{aligned}$$

Let  $\mathfrak{W}_n = \max\left\{\mathfrak{R}_n^{\text{buf}}, \frac{2C_d^2 n \log(n/\delta)}{s}\right\}$ . Concentrating only on the portion of the expression involving  $\epsilon$  and ignoring the constants, we get

$$\begin{aligned} &\epsilon \mathfrak{R}_n^{\text{buf}} + \frac{C_d^2 n \log(n/\delta)}{\epsilon s} + \sqrt{\frac{C_d^2 n \log(n/\delta)}{\epsilon s} \log \frac{\log n}{\delta}} \\ &\leq \epsilon \mathfrak{R}_n^{\text{buf}} + \frac{2C_d^2 n \log(n/\delta)}{\epsilon s} \leq \epsilon \mathfrak{W}_n + \frac{2C_d^2 n \log(n/\delta)}{\epsilon s} \\ &\leq 2C_d \sqrt{\frac{2\mathfrak{W}_n n \log(n/\delta)}{s}}, \end{aligned}$$

where the second step follows since  $\epsilon \leq 1$  and  $s \leq n$  and the fourth step follows by using  $\epsilon = \sqrt{\frac{2C_d^2 n \log(n/\delta)}{\mathfrak{W}_n s}} \leq 1$ . Putting this into the excess risk expression gives us

$$\begin{aligned} \frac{1}{n-1} \sum_{t=2}^n \mathcal{L}(h_{t-1}) &\leq \mathcal{L}(h^*) + \frac{\mathfrak{R}_n^{\text{buf}}}{n-1} \\ &\quad + C_d \cdot \mathcal{O}\left(\sqrt{\frac{\mathfrak{W}_n \log(n/\delta)}{sn}}\right), \end{aligned}$$

which finishes the proof. Note that in case  $\mathfrak{W}_n = \mathfrak{R}_n^{\text{buf}}$ , we get

$$\begin{aligned} \frac{1}{n-1} \sum_{t=2}^n \mathcal{L}(h_{t-1}) &\leq \mathcal{L}(h^*) + \frac{\mathfrak{R}_n^{\text{buf}}}{n-1} \\ &\quad + C_d \cdot \mathcal{O}\left(\sqrt{\frac{\mathfrak{R}_n^{\text{buf}} \log(n/\delta)}{sn}}\right). \end{aligned}$$

On the other hand if  $\mathfrak{R}_n^{\text{buf}} \leq \frac{2C_d^2 n \log(n/\delta)}{s}$ , we get

$$\begin{aligned} \frac{1}{n-1} \sum_{t=2}^n \mathcal{L}(h_{t-1}) &\leq \mathcal{L}(h^*) + \frac{\mathfrak{R}_n^{\text{buf}}}{n-1} \\ &\quad + C_d^2 \cdot \mathcal{O}\left(\frac{\log(n/\delta)}{s}\right). \end{aligned}$$

## E. Proof of Theorem 7

Recall that we are considering a composition classes of the form  $\ell \circ \mathcal{H} := \{(z, z') \mapsto \ell(h(z, z'), h \in \mathcal{H})\}$  where  $\ell$  is some Lipschitz loss function. We have  $\ell(h, z_1, z_2) = \phi(h(x_1, x_2)Y(y_1, y_2))$  where  $Y(y_1, y_2) = y_1 - y_2$  or

$Y(y_1, y_2) = y_1 y_2$  and  $\phi : \mathbb{R} \rightarrow \mathbb{R}$  involves some margin loss function. We also assume that  $\phi$  is point wise  $L$ -Lipschitz. Let  $Y = \sup_{y_1, y_2 \in \mathcal{Y}} |Y(y_1, y_2)|$ .

**Theorem 20** (Theorem 7 restated).

$$\mathcal{R}_n(\ell \circ \mathcal{H}) \leq LY \mathcal{R}_n(\mathcal{H})$$

*Proof.* Let  $\tilde{\phi}(x) = \phi(x) - \phi(0)$ . Note that  $\tilde{\phi}(\cdot)$  is point wise  $L$ -Lipschitz as well as satisfies  $\tilde{\phi}(0) = 0$ . Let  $Y = \sup_{y, y' \in \mathcal{Y}} |Y(y, y')|$ .

We will require the following contraction lemma that we state below.

**Theorem 21** (Implicit in proof of (Ledoux & Talagrand, 2002), Theorem 4.12). *Let  $\mathcal{H}$  be a set of bounded real valued functions from some domain  $\mathcal{X}$  and let  $\mathbf{x}_1, \dots, \mathbf{x}_n$  be arbitrary elements from  $\mathcal{X}$ . Furthermore, let  $\phi_i : \mathbb{R} \rightarrow \mathbb{R}$ ,  $i = 1, \dots, n$  be  $L$ -Lipschitz functions such that  $\phi_i(0) = 0$  for all  $i$ . Then we have*

$$\mathbb{E} \left[ \sup_{h \in \mathcal{H}} \frac{1}{n} \sum_{i=1}^n \epsilon_i \phi_i(h(\mathbf{x}_i)) \right] \leq L \mathbb{E} \left[ \sup_{h \in \mathcal{H}} \frac{1}{n} \sum_{i=1}^n \epsilon_i h(\mathbf{x}_i) \right].$$

Using the above inequality we can state the following chain of (in)equalities:

$$\begin{aligned} \mathcal{R}_n(\ell \circ \mathcal{H}) &= \mathbb{E} \left[ \sup_{h \in \mathcal{H}} \frac{1}{n} \sum_{i=1}^n \epsilon_i \ell(h, \mathbf{z}, \mathbf{z}_i) \right] \\ &= \mathbb{E} \left[ \sup_{h \in \mathcal{H}} \frac{1}{n} \sum_{i=1}^n \epsilon_i \phi(h(\mathbf{x}, \mathbf{x}_i)Y(y, y_i)) \right] \\ &= \mathbb{E} \left[ \sup_{h \in \mathcal{H}} \frac{1}{n} \sum_{i=1}^n \epsilon_i \tilde{\phi}(h(\mathbf{x}, \mathbf{x}_i)Y(y, y_i)) \right] \\ &\quad + \phi(0) \mathbb{E} \left[ \frac{1}{n} \sum_{i=1}^n \epsilon_i \right] \\ &= \mathbb{E} \left[ \sup_{h \in \mathcal{H}} \frac{1}{n} \sum_{i=1}^n \epsilon_i \tilde{\phi}(h(\mathbf{x}, \mathbf{x}_i)Y(y, y_i)) \right] \\ &\leq LY \mathbb{E} \left[ \sup_{h \in \mathcal{H}} \frac{1}{n} \sum_{i=1}^n \epsilon_i h(\mathbf{x}, \mathbf{x}_i) \right] \\ &= LY \mathcal{R}_n(\mathcal{H}), \end{aligned}$$

where the fourth step follows from linearity of expectation. The fifth step is obtained by applying the contraction inequality to the functions  $\psi_i : x \mapsto \tilde{\phi}(a_i x)$  where  $a_i = Y(y, y_i)$ . We exploit the fact that the contraction inequality is actually proven for the empirical Rademacher averages due to which we can take  $a_i = Y(y, y_i)$  to be a constant dependent only on  $i$ ,

use the inequality, and subsequently take expectations. We also have, for any  $i$  and any  $x, y \in \mathbb{R}$ ,

$$\begin{aligned} |\psi_i(x) - \psi_i(y)| &= |\tilde{\phi}(a_i x) - \tilde{\phi}(a_i y)| \\ &\leq L |a_i x - a_i y| \\ &\leq L |a_i| |x - y| \\ &\leq LY |x - y|, \end{aligned}$$

which shows that every function  $\psi_i(\cdot)$  is  $LY$ -Lipschitz and satisfies  $\psi_i(0) = 0$ . This makes an application of the contraction inequality possible on the empirical Rademacher averages which upon taking expectations give us the result.  $\square$

## F. Applications

In this section we shall derive Rademacher complexity bounds for hypothesis classes used in various learning problems. Crucial to our derivations shall be the following result by (Kakade et al., 2008). Recall the usual definition of Rademacher complexity of a *univariate* function class  $\mathcal{F} = \{f : \mathcal{X} \rightarrow \mathbb{R}\}$

$$\mathcal{R}_n(\mathcal{F}) = \mathbb{E} \left[ \sup_{f \in \mathcal{F}} \frac{1}{n} \sum_{i=1}^n \epsilon_i f(\mathbf{x}_i) \right].$$

**Theorem 22** ((Kakade et al., 2008), Theorem 1). *Let  $\mathcal{W}$  be a closed and convex subset of some Banach space equipped with a norm  $\|\cdot\|$  and dual norm  $\|\cdot\|_*$ . Let  $F : \mathcal{W} \rightarrow \mathbb{R}$  be  $\sigma$ -strongly convex with respect to  $\|\cdot\|_*$ . Assume  $\mathcal{W} \subseteq \{\mathbf{w} : F(\mathbf{w}) \leq W_*^2\}$ . Furthermore, let  $\mathcal{X} = \{\mathbf{x} : \|\mathbf{x}\| \leq X\}$  and  $\mathcal{F}_{\mathcal{W}} := \{\mathbf{w} \mapsto \langle \mathbf{w}, \mathbf{x} \rangle : \mathbf{w} \in \mathcal{W}, \mathbf{x} \in \mathcal{X}\}$ . Then, we have*

$$\mathcal{R}_n(\mathcal{F}_{\mathcal{W}}) \leq XW_* \sqrt{\frac{2}{\sigma n}}.$$

We note that Theorem 22 is applicable only to first order learning problems since it gives bounds for univariate function classes. However, our hypothesis classes consist of bivariate functions which makes a direct application difficult. Recall our extension of Rademacher averages to bivariate function classes:

$$\mathcal{R}_n(\mathcal{H}) = \mathbb{E} \left[ \sup_{h \in \mathcal{H}} \frac{1}{n} \sum_{i=1}^n \epsilon_i h(\mathbf{z}, \mathbf{z}_i) \right]$$

where the expectation is over  $\epsilon_i, \mathbf{z}$  and  $\mathbf{z}_i$ . To overcome the above problem we will use the following two step proof technique:

1. **Order reduction:** We shall cast our learning problems in a modified input domain where predictors behave linearly as univariate functions.

| Hypothesis class                   | Rademacher Complexity                                                  |
|------------------------------------|------------------------------------------------------------------------|
| $\mathcal{B}_q(\ \mathcal{W}\ _q)$ | $2 \ \mathcal{X}\ _p \ \mathcal{W}\ _q \sqrt{\frac{p-1}{n}}$           |
| $\mathcal{B}_1(\ \mathcal{W}\ _1)$ | $2 \ \mathcal{X}\ _\infty \ \mathcal{W}\ _1 \sqrt{\frac{e \log d}{n}}$ |

Table 1. Rademacher complexity bounds for AUC maximization. We have  $1/p + 1/q = 1$  and  $q > 1$ .

More specifically, given a hypothesis class  $\mathcal{H}$  and domain  $\mathcal{X}$ , we shall construct a modified domain  $\tilde{\mathcal{X}}$  and a map  $\psi : \mathcal{X} \times \mathcal{X} \rightarrow \tilde{\mathcal{X}}$  such that for any  $\mathbf{x}, \mathbf{x}' \in \mathcal{X}$  and  $h \in \mathcal{H}$ , we have  $h(\mathbf{x}, \mathbf{x}') = \langle h, \psi(\mathbf{x}, \mathbf{x}') \rangle$ .

2. **Conditioning:** For every  $\mathbf{x} \in \mathcal{X}$ , we will create a function class  $\mathcal{F}_{\mathbf{x}} = \{\mathbf{x}' \mapsto \langle h, \psi(\mathbf{x}, \mathbf{x}') \rangle : h \in \mathcal{H}\}$ . Since  $\mathcal{F}_{\mathbf{x}}$  is a univariate function class, we will use Theorem 22 to bound  $\mathcal{R}_n(\mathcal{F}_{\mathbf{x}})$ . Since  $\mathcal{R}_n(\mathcal{H}) = \mathbb{E}[\mathcal{R}_n(\mathcal{F}_{\mathbf{x}})]$ , we shall obtain Rademacher complexity bounds for  $\mathcal{H}$ .

We give below some examples of learning situations where these results may be applied.

As before, for any subset  $X$  of a Banach space and any norm  $\|\cdot\|_p$ , we define  $\|X\|_p := \sup_{\mathbf{x} \in X} \|\mathbf{x}\|_p$ . We also define norm bounded balls in the Banach space as  $\mathcal{B}_p(r) := \{\mathbf{x} : \|\mathbf{x}\|_p \leq r\}$  for any  $r > 0$ . Let the domain  $\mathcal{X}$  be a subset of  $\mathbb{R}^d$ .

For sake of convenience we present the examples using loss functions for classification tasks but the same can be extended to other learning problems such as regression, multi-class classification and ordinal regression.

### F.1. AUC maximization for Linear Prediction

In this case the goal is to maximize the area under the ROC curve for a linear classification problem at hand. This translates itself to a learning situation where  $\mathcal{W}, \mathcal{X} \subseteq \mathbb{R}^d$ . We have  $h_{\mathbf{w}}(\mathbf{x}, \mathbf{x}') = \mathbf{w}^\top \mathbf{x} - \mathbf{w}^\top \mathbf{x}'$  and  $\ell(h_{\mathbf{w}}, z_1, z_2) = \phi((y - y')h_{\mathbf{w}}(\mathbf{x}, \mathbf{x}'))$  where  $\phi$  is the hinge loss or the exponential loss (Zhao et al., 2011).

In order to apply Theorem 22, we rewrite the hypothesis as  $h_{\mathbf{w}}(\mathbf{x}, \mathbf{x}') = \mathbf{w}^\top (\mathbf{x} - \mathbf{x}')$  and consider the input domain  $\tilde{\mathcal{X}} = \{\mathbf{x} - \mathbf{x}' : \mathbf{x}, \mathbf{x}' \in \mathcal{X}\}$  and the map  $\psi : (\mathbf{x}, \mathbf{x}') \mapsto \mathbf{x} - \mathbf{x}'$ . Clearly if  $\mathcal{X} \subseteq \{\mathbf{x} : \|\mathbf{x}\| \leq X\}$  then  $\tilde{\mathcal{X}} \subseteq \{\mathbf{x} : \|\mathbf{x}\| \leq 2X\}$  and thus we have  $\|\tilde{\mathcal{X}}\| \leq 2\|\mathcal{X}\|$  for any norm  $\|\cdot\|$ . It is now possible to regularize the hypothesis class  $\mathcal{W}$  using a variety of norms.

If we wish to define our hypothesis class as  $\mathcal{B}_q(\cdot), q > 1$ , then in order to apply Theorem 22, we can use the regularizer  $F(\mathbf{w}) = \|\mathbf{w}\|_q^2$ . If we wish the sparse

| Hypothesis Class                             | Rademacher Complexity                                                                      |
|----------------------------------------------|--------------------------------------------------------------------------------------------|
| $\mathcal{B}_{2,2}(\ \mathcal{W}\ _{2,2})$   | $\ \mathcal{X}\ _2^2 \ \mathcal{W}\ _{2,2} \sqrt{\frac{1}{n}}$                             |
| $\mathcal{B}_{2,1}(\ \mathcal{W}\ _{2,1})$   | $\ \mathcal{X}\ _2 \ \mathcal{X}\ _\infty \ \mathcal{W}\ _{2,1} \sqrt{\frac{e \log d}{n}}$ |
| $\mathcal{B}_{1,1}(\ \mathcal{W}\ _{1,1})$   | $\ \mathcal{X}\ _\infty^2 \ \mathcal{W}\ _{1,1} \sqrt{\frac{2e \log d}{n}}$                |
| $\mathcal{B}_{S(1)}(\ \mathcal{W}\ _{S(1)})$ | $\ \mathcal{X}\ _2^2 \ \mathcal{W}\ _{S(1)} \sqrt{\frac{e \log d}{n}}$                     |

Table 2. Rademacher complexity bounds for Similarity and Metric learning

hypotheses class,  $\mathcal{B}_1(W_1)$ , we can use the regularizer  $F(\mathbf{w}) = \|\mathbf{w}\|_q^2$  with  $q = \frac{\log d}{\log d - 1}$  as this regularizer is strongly convex with respect to the  $L_1$  norm (Kakade et al., 2012). Table 1 gives a succinct summary of such possible regularizations and corresponding Rademacher complexity bounds.

*Kernelized AUC maximization:* Since the  $L_2$  regularized hypothesis class has a dimension independent Rademacher complexity, it is possible to give guarantees for algorithms performing AUC maximization using kernel classifiers as well. In this case we have a Mercer kernel  $K$  with associated reproducing kernel Hilbert space  $\mathcal{H}_K$  and feature map  $\Phi_K : \mathcal{X} \rightarrow \mathcal{H}_K$ . Our predictors lie in the RKHS, i.e.,  $\mathbf{w} \in \mathcal{H}_K$  and we have  $h_{\mathbf{w}}(\mathbf{x}, \mathbf{x}') = \mathbf{w}^\top (\Phi_K(\mathbf{x}) - \Phi_K(\mathbf{x}'))$ . In this case we will have to use the map  $\psi : (\mathbf{x}, \mathbf{x}') \mapsto \Phi_K(\mathbf{x}) - \Phi_K(\mathbf{x}') \in \mathcal{H}_K$ . If the kernel is bounded, i.e., for all  $\mathbf{x}, \mathbf{x}' \in \mathcal{X}$ , we have  $|K(\mathbf{x}, \mathbf{x}')| \leq \kappa^2$ , then we can get a Rademacher average bound of  $2\kappa \|\mathcal{W}\|_2 \sqrt{\frac{1}{n}}$ .

## F.2. Linear Similarity and Mahalanobis Metric learning

A variety of applications, such as in vision, require one to fine tune one’s notion of proximity by learning a similarity or metric function over the input space. We consider some such examples below. In the following, we have  $\mathbf{W} \in \mathbb{R}^{d \times d}$ .

1. *Mahalanobis metric learning:* in this case we wish to learn a metric  $M_{\mathbf{W}}(\mathbf{x}, \mathbf{x}') = (\mathbf{x} - \mathbf{x}')^\top \mathbf{W}(\mathbf{x} - \mathbf{x}')$  using the loss function  $\ell(M_{\mathbf{W}}, \mathbf{z}, \mathbf{z}') = \phi(y y' (1 - M_{\mathbf{W}}^2(\mathbf{x}, \mathbf{x}')))$  (Jin et al., 2009).
2. *Linear kernel learning:* in this case we wish to learn a linear kernel function  $K_{\mathbf{W}}(\mathbf{x}, \mathbf{x}') = \mathbf{x}^\top \mathbf{W} \mathbf{x}'$ ,  $\mathbf{W} \succeq 0$ . A variety of loss functions have been proposed to aid the learning process
  - (a) *Kernel-target Alignment:* the loss function used is  $\ell(K_{\mathbf{W}}, \mathbf{z}, \mathbf{z}') = \phi(y y' K_{\mathbf{W}}(\mathbf{x}, \mathbf{x}'))$  where  $\phi$  is used to encode some notion of alignment (Cristianini et al., 2001; Cortes et al., 2010b).

- (b) *S-Goodness:* this is used in case one wishes to learn a *good* similarity function that need not be positive semi definite (Bellet et al., 2012; Balcan & Blum, 2006) by defining  $\ell(K_{\mathbf{W}}, \mathbf{z}) = \phi\left(y \mathbb{E}_{(\mathbf{x}', y')} [y' K_{\mathbf{W}}(\mathbf{x}, \mathbf{x}')] \right)$ .

In order to apply Theorem 22, we will again rewrite the hypothesis and consider a different input domain. For the similarity learning problem, write the similarity function as  $K_{\mathbf{W}}(\mathbf{x}, \mathbf{x}') = \langle \mathbf{W}, \mathbf{x} \mathbf{x}'^\top \rangle$  and consider the input space  $\tilde{\mathcal{X}} = \{\mathbf{x} \mathbf{x}'^\top : \mathbf{x}, \mathbf{x}' \in \mathcal{X}\} \subseteq \mathbb{R}^{d \times d}$  along with the map  $\psi : (\mathbf{x}, \mathbf{x}') \mapsto \mathbf{x} \mathbf{x}'^\top$ . For the metric learning problem, rewrite the metric as  $M_{\mathbf{W}}(\mathbf{x}, \mathbf{x}') = \langle \mathbf{W}, (\mathbf{x} - \mathbf{x}')(\mathbf{x} - \mathbf{x}')^\top \rangle$  and consider the input space  $\tilde{\mathcal{X}} = \{(\mathbf{x} - \mathbf{x}')(\mathbf{x} - \mathbf{x}')^\top : \mathbf{x}, \mathbf{x}' \in \mathcal{X}\} \subseteq \mathbb{R}^{d \times d}$  along with the map  $\psi : (\mathbf{x}, \mathbf{x}') \mapsto (\mathbf{x} - \mathbf{x}')(\mathbf{x} - \mathbf{x}')^\top$ .

In this case it is possible to apply a variety of matrix norms to regularize the hypothesis class. We consider the following (mixed) matrix norms:  $\|\cdot\|_{1,1}$ ,  $\|\cdot\|_{2,1}$  and  $\|\cdot\|_{2,2}$ . We also consider the Schatten norm  $\|\mathbf{X}\|_{S(p)} := \|\boldsymbol{\sigma}(\mathbf{X})\|_p$  that includes the widely used *trace norm*  $\|\boldsymbol{\sigma}(\mathbf{X})\|_1$ . As before, we define norm bounded balls in the Banach space as follows:  $\mathcal{B}_{p,q}(r) := \{\mathbf{x} : \|\mathbf{x}\|_{p,q} \leq r\}$ .

Using results on construction of strongly convex functions with respect to these norms from (Kakade et al., 2012), it is possible to get bounds on the Rademacher averages of the various hypothesis classes. However these bounds involve norm bounds for the modified domain  $\tilde{\mathcal{X}}$ . We make these bounds explicit by expressing norm bounds for  $\tilde{\mathcal{X}}$  in terms of those for  $\mathcal{X}$ . From the definition of  $\tilde{\mathcal{X}}$  for the similarity learning problems, we get, for any  $p, q \geq 1$ ,  $\|\tilde{\mathcal{X}}\|_{p,q} \leq \|\mathcal{X}\|_p \|\mathcal{X}\|_q$ .

Also, since every element of  $\tilde{\mathcal{X}}$  is of the form  $\mathbf{x} \mathbf{x}'^\top$ , it has only one non zero singular value  $\|\mathbf{x}\|_2 \|\mathbf{x}'\|_2$  which gives us  $\|\tilde{\mathcal{X}}\|_{S(p)} \leq \|\mathcal{X}\|_2^2$  for any  $p \geq 1$ .

For the metric learning problem, we can similarly get  $\|\tilde{\mathcal{X}}\|_{p,q} \leq 4 \|\mathcal{X}\|_p \|\mathcal{X}\|_q$  and  $\|\tilde{\mathcal{X}}\|_{S(p)} \leq 4 \|\mathcal{X}\|_2^2$  for any  $p \geq 1$  which allows us to get similar bounds as those for similarity learning but for an extra constant factor. We summarize our bounds in Table 2. We note that (Cao et al., 2012) devote a substantial amount of effort to calculate these values for the mixed norms on a case-by-case basis (and do not consider Schatten norms either) whereas, using results exploiting strong convexity and strong smoothness from (Kakade et al., 2012), we are able to get the same as simple corollaries.

| Hypothesis Class   | Rademacher Avg. Bound                |
|--------------------|--------------------------------------|
| $\mathcal{S}_2(1)$ | $\kappa^2 \sqrt{\frac{p}{n}}$        |
| $\Delta(1)$        | $\kappa^2 \sqrt{\frac{e \log p}{n}}$ |

Table 3. Rademacher complexity bounds for Multiple kernel learning

### F.3. Two-stage Multiple kernel learning

The analysis of the previous example can be replicated for learning non-linear Mercer kernels as well. Additionally, since all Mercer kernels yield Hilbertian metrics, these methods can be extended to learning Hilbertian metrics as well. However, since Hilbertian metric learning has not been very popular in literature, we restrict our analysis to kernel learning alone. We present this example using the framework proposed by (Kumar et al., 2012) due to its simplicity and generality.

We are given  $p$  Mercer kernels  $K_1, \dots, K_p$  that are bounded, i.e., for all  $i$ ,  $|K_i(\mathbf{x}, \mathbf{x}')| \leq \kappa^2$  for all  $\mathbf{x}, \mathbf{x}' \in \mathcal{X}$  and our task is to find a combination of these kernels given by a vector  $\boldsymbol{\mu} \in \mathbb{R}^p, \boldsymbol{\mu} \geq 0$  such that the kernel  $K_{\boldsymbol{\mu}}(\mathbf{x}, \mathbf{x}') = \sum_{i=1}^p \mu_i K_i(\mathbf{x}, \mathbf{x}')$  is a *good* kernel (Balcan & Blum, 2006). In this case the loss function used is  $\ell(\boldsymbol{\mu}, \mathbf{z}, \mathbf{z}') = \phi(y y' K_{\boldsymbol{\mu}}(\mathbf{x}, \mathbf{x}'))$  where  $\phi(\cdot)$  is meant to encode some notion of alignment. Kumar et al. (2012) take  $\phi(\cdot)$  to be the hinge loss.

To apply Theorem 22, we simply use the “K-space” construction proposed in (Kumar et al., 2012). We write  $K_{\boldsymbol{\mu}}(\mathbf{x}, \mathbf{x}') = \langle \boldsymbol{\mu}, \mathbf{z}(\mathbf{x}, \mathbf{x}') \rangle$  where  $\mathbf{z}(\mathbf{x}, \mathbf{x}') = (K_1(\mathbf{x}, \mathbf{x}'), \dots, K_p(\mathbf{x}, \mathbf{x}'))$ . Consequently our modified input space looks like  $\tilde{\mathcal{X}} = \{\mathbf{z}(\mathbf{x}, \mathbf{x}') : \mathbf{x}, \mathbf{x}' \in \mathcal{X}\} \subseteq \mathbb{R}^p$  with the map  $\psi : (\mathbf{x}, \mathbf{x}') \mapsto \mathbf{z}(\mathbf{x}, \mathbf{x}')$ . Popular regularizations on the kernel combination vector  $\boldsymbol{\mu}$  include the sparsity inducing  $L_1$  regularization that constrains  $\boldsymbol{\mu}$  to lie on the unit simplex  $\Delta(1) = \{\boldsymbol{\mu} : \|\boldsymbol{\mu}\|_1 = 1, \boldsymbol{\mu} \geq 0\}$  and  $L_2$  regularization that restricts  $\boldsymbol{\mu}$  to lie on the unit sphere  $\mathcal{S}_2(1) = \{\boldsymbol{\mu} : \|\boldsymbol{\mu}\|_2 = 1, \boldsymbol{\mu} \geq 0\}$ . Arguments similar to the one used to discuss the case of AUC maximization for linear predictors give us bounds on the Rademacher averages for these two hypothesis classes in terms of  $\|\tilde{\mathbf{X}}\|_2$  and  $\|\tilde{\mathbf{X}}\|_{\infty}$ . Since  $\|\tilde{\mathbf{X}}\|_2 \leq \kappa^2 \sqrt{p}$  and  $\|\tilde{\mathbf{X}}\|_{\infty} \leq \kappa^2$ , we obtain explicit bounds on the Rademacher averages that are given in Table 3.

We note that for the  $L_1$  regularized case, our bound has a similar dependence on the number of kernels, i.e.,  $\sqrt{\log p}$  as the bounds presented in (Cortes et al., 2010a). For the  $L_2$  case however, we have a worse dependence of  $\sqrt{p}$  than Cortes et al. (2010a) who get a  $\sqrt{p}$  dependence. However, it is a bit unfair to compare

the two bounds since Cortes et al. (2010a) consider single stage kernel learning algorithms that try to learn the kernel combination as well as the classifier in a single step whereas we are dealing with a two-stage process where classifier learning is disjoint from the kernel learning step.

## G. Regret Bounds for Reservoir Sampling Algorithms

The Reservoir Sampling algorithm (Vitter, 1985) essentially performs sampling without replacement which means that the samples present in the buffer are not i.i.d. samples from the preceding stream. Due to this, proving regret bounds by way of uniform convergence arguments becomes a bit more difficult. However, there has been a lot of work on analyzing learning algorithms that learn from non-i.i.d. data such as data generated by ergodic processes. Of particular interest is a result by Serfling<sup>2</sup> that gives Hoeffding style bounds for data generated from a finite population without replacement.

Although Serfling’s result does provide a way to analyze the **RS** algorithm, doing so directly would require using arguments that involve covering numbers that offer bounds that are dimension dependent and that are not tight. It would be interesting to see if equivalents of the McDiarmid’s inequality and Rademacher averages can be formulated for samples obtained without replacement to get tighter results. For our purposes, we remedy the situation by proposing a new sampling algorithm that gives us i.i.d. samples in the buffer allowing existing techniques to be used to obtain regret bounds (see Appendices H and I).

## H. Analysis of the RS-x Algorithm

In this section we analyze the **RS-x** substream sampling algorithm and prove its statistical properties. Recall that the **RS-x** algorithm simply admits a point into the buffer if there is space. It performs a *Repopulation step* at the first instance of overflow which involves refilling the buffer by sampling with replacement from all the set of points seen so far (including the one that caused the overflow). In subsequent steps, a *Normal update step* is performed. The following theorem formalizes the properties of the sampling algorithm

**Theorem 23.** *Suppose we have a stream of elements  $\mathbf{z}_1, \dots, \mathbf{z}_n$  being sampled into a buffer  $B$  of size  $s$  using*

<sup>2</sup>R. J. Serfling, Probability Inequalities for the Sum in Sampling without Replacement, *The Annals of Statistics*, 2(1):39-48, 1974.

the **RS-x** algorithm. Then at any time  $t \geq s+2$ , each element of  $B$  is an i.i.d. sample from the set  $Z^{t-1}$ .

*Proof.* To prove the results, let us assume that the buffer contents are addressed using the variables  $\zeta_1, \dots, \zeta_s$ . We shall first concentrate on a fixed element, say  $\zeta_1$  (which we shall call simply  $\zeta$  for notational convenience) of the buffer and inductively analyze the probability law  $\mathcal{P}_t$  obeyed by  $\zeta$  at each time step  $t \geq s+2$ .

We will prove that the probability law obeyed by  $\zeta$  at time  $t$  is  $\mathcal{P}_t(\zeta) = \frac{1}{t-1} \sum_{\tau=1}^{t-1} \mathbb{1}_{\{\zeta=\mathbf{z}_\tau\}}$ . The law is interpreted as saying the following: for any  $\tau \leq t-1$ ,  $\mathbb{P}[\zeta = \mathbf{z}_\tau] = \frac{1}{t-1}$  and shows that the element  $\zeta$  is indeed a uniform sample from the set  $Z^{t-1}$ . We would similarly be able to show this for all locations  $\zeta_2, \dots, \zeta_s$  which would prove that the elements in the buffer are indeed identical samples from the preceding stream. Since at each step, the **RS-x** algorithm updates all buffer locations independently, the random variables  $\zeta_1, \dots, \zeta_s$  are independent as well which would allow us to conclude that at each step we have  $s$  i.i.d. samples in the buffer as claimed.

We now prove the probability law for  $\zeta$ . We note that the repopulation step done at time  $t = s+1$  explicitly ensures that at step  $t = s+2$ , the buffer contains  $s$  i.i.d. samples from  $Z^{s+1}$  i.e.  $\mathcal{P}_{s+2}(\zeta) = \frac{1}{s+1} \sum_{\tau=1}^{s+1} \mathbb{1}_{\{\zeta=\mathbf{z}_\tau\}}$ . This forms the initialization of our inductive argument. Now suppose that at the  $t^{\text{th}}$  time step, the claim is true and  $\zeta$  obeys the law  $\mathcal{P}_t(\zeta) = \frac{1}{t-1} \sum_{\tau=1}^{t-1} \mathbb{1}_{\{\zeta=\mathbf{z}_\tau\}}$ . At the  $t^{\text{th}}$  step, we would update the buffer by making the incoming element  $\mathbf{z}_t$  replace the element present at the location indexed by  $\zeta$  with probability  $1/(t+1)$ . Hence  $\zeta$  would obey the following law after the update

$$\left(1 - \frac{1}{t}\right) \mathcal{P}_t(\zeta) + \frac{1}{t} \mathbb{1}_{\{\zeta=\mathbf{z}_t\}} = \frac{1}{t} \sum_{\tau=1}^t \mathbb{1}_{\{\zeta=\mathbf{z}_\tau\}}$$

which shows that at the  $(t+1)^{\text{th}}$  step,  $\zeta$  would follow the law  $\mathcal{P}_{t+1}(\zeta) = \frac{1}{t} \sum_{\tau=1}^t \mathbb{1}_{\{\zeta=\mathbf{z}_\tau\}}$  which completes the inductive argument and the proof.  $\square$

## I. Proof of Theorem 8

We now prove Theorem 8 that gives a high confidence regret bound for the **OLP** learning algorithm when used along with the **RS-x** buffer update policy. Our proof proceeds in two steps: in the first step we prove a uniform convergence type guarantee that would allow us to convert regret bounds with respect to the *finite-buffer* penalties  $\hat{\mathcal{L}}_t^{\text{buf}}$  into regret bounds in terms of the *all-pairs* loss functions  $\hat{\mathcal{L}}_t$ . In the second step we

then prove a regret bound for **OLP** with respect to the *finite-buffer* penalties.

We proceed with the first step of the proof by proving the lemma given below. Recall that for any sequence of training examples  $\mathbf{z}_1, \dots, \mathbf{z}_n$ , we define, for any  $h \in \mathcal{H}$ , the all-pairs loss function as  $\hat{\mathcal{L}}_t(h) = \frac{1}{t-1} \sum_{\tau=1}^{t-1} \ell(h, \mathbf{z}_t, \mathbf{z}_\tau)$ . Moreover, if the online learning process uses a buffer, then we also define the *finite-buffer* loss function as  $\hat{\mathcal{L}}_t^{\text{buf}}(h_{t-1}) = \frac{1}{|B_t|} \sum_{\mathbf{z} \in B_t} \ell(h_{t-1}, \mathbf{z}_t, \mathbf{z})$ .

**Lemma 24.** Suppose we have an online learning algorithm that incurs buffer penalties based on a buffer  $B$  of size  $s$  that is updated using the **RS-x** algorithm. Suppose further that the learning algorithm generates an ensemble  $h_1, \dots, h_{n-1}$ . Then for any  $t \in [1, n-1]$ , with probability at least  $1-\delta$  over the choice of the random variables used to update the buffer  $B$  until time  $t$ , we have

$$\hat{\mathcal{L}}_t(h_{t-1}) \leq \hat{\mathcal{L}}_t^{\text{buf}}(h_{t-1}) + C_d \cdot \mathcal{O} \left( \sqrt{\frac{\log \frac{1}{\delta}}{s}} \right)$$

*Proof.* Suppose  $t \leq s+1$ , then since at that point the buffer stores the stream exactly, we have

$$\hat{\mathcal{L}}_t(h_{t-1}) = \hat{\mathcal{L}}_t^{\text{buf}}(h_{t-1})$$

which proves the result. Note that, as Algorithm 2 indicates, at step  $t = s+1$  the buffer is updated (using the repopulation step) only after the losses have been calculated and hence step  $t = s+1$  still works with a buffer that stores the stream exactly.

We now analyze the case  $t > s+1$ . At each step  $\tau > s$ , the **RS-x** algorithm uses  $s$  independent Bernoulli random variables (which we call *auxiliary random variables*) to update the buffer, call them  $r_1^\tau, \dots, r_s^\tau$  where  $r_j^\tau$  is used to update the  $j^{\text{th}}$  item  $\zeta_j$  in the buffer. Let  $\mathbf{r}_j^\tau := \{r_j^{s+1}, r_j^2, \dots, r_j^t\} \in \{0, 1\}^t$  denote an ensemble random variable composed of  $t-s$  independent Bernoulli variables. It is easy to see that the element  $\zeta_j$  is completely determined at the  $t^{\text{th}}$  step given  $\mathbf{r}_j^{t-1}$ .

Theorem 23 shows, for any  $t > s+1$ , that the buffer contains  $s$  i.i.d. samples from the set  $Z^{t-1}$ . Thus, for any *fixed* function  $h \in \mathcal{H}$ , we have for any  $j \in [s]$ ,

$$\mathbb{E}_{\mathbf{r}_j^{t-1}} [\ell(h, \mathbf{z}_t, \zeta_j)] = \frac{1}{t-1} \sum_{\tau=1}^{t-1} \ell(h, \mathbf{z}_t, \mathbf{z}_\tau)$$

which in turn shows us that

$$\mathbb{E}_{\mathbf{r}_1^{t-1}, \dots, \mathbf{r}_s^{t-1}} [\hat{\mathcal{L}}_t^{\text{buf}}(h)] = \frac{1}{t-1} \sum_{\tau=1}^{t-1} \ell(h, \mathbf{z}_t, \mathbf{z}_\tau) = \hat{\mathcal{L}}_t(h)$$

Now consider a ghost sample of auxiliary random variables  $\tilde{\mathbf{r}}_1^{t-1}, \dots, \tilde{\mathbf{r}}_s^{t-1}$ . Since our hypothesis  $h_{t-1}$  is independent of these ghost variables, we can write

$$\mathbb{E}_{\tilde{\mathbf{r}}_1^{t-1}, \dots, \tilde{\mathbf{r}}_s^{t-1}} \left[ \hat{\mathcal{L}}_t^{\text{buf}}(h_{t-1}) \right] = \hat{\mathcal{L}}_t(h_{t-1})$$

We recall that error in the proof presented in Zhao et al. (2011) was to apply such a result on the *true* auxiliary variables upon which  $h_{t-1}$  is indeed dependent. Thus we have

$$\begin{aligned} & \hat{\mathcal{L}}_t(h_{t-1}) - \hat{\mathcal{L}}_t^{\text{buf}}(h_{t-1}) \\ &= \mathbb{E}_{\tilde{\mathbf{r}}_1^{t-1}, \dots, \tilde{\mathbf{r}}_s^{t-1}} \left[ \hat{\mathcal{L}}_t^{\text{buf}}(h_{t-1}) \right] - \hat{\mathcal{L}}_t^{\text{buf}}(h_{t-1}) \\ &\leq \sup_{h \in \mathcal{H}} \underbrace{\left[ \mathbb{E}_{\tilde{\mathbf{r}}_1^{t-1}, \dots, \tilde{\mathbf{r}}_s^{t-1}} \left[ \hat{\mathcal{L}}_t^{\text{buf}}(h) \right] - \hat{\mathcal{L}}_t^{\text{buf}}(h) \right]}_{g_t(\mathbf{r}_1^{t-1}, \dots, \mathbf{r}_s^{t-1})} \end{aligned}$$

Now, the perturbation to any of the ensemble variables  $\mathbf{r}_j$  (a perturbation to an ensemble variable implies a perturbation to one or more variables forming that ensemble) can only perturb only the element  $\zeta_j$  in the buffer. Since  $\hat{\mathcal{L}}_t^{\text{buf}}(h_{t-1}) = \frac{1}{s} \sum_{\mathbf{z} \in B_t} \ell(h_{t-1}, \mathbf{z}_t, \mathbf{z})$  and the loss function is  $B$ -bounded, this implies that a perturbation to any of the ensemble variables can only perturb  $g(\mathbf{r}_1^{t-1}, \dots, \mathbf{r}_s^{t-1})$  by at most  $B/s$ . Hence an application of McDiarmid's inequality gives us, with probability at least  $1 - \delta$ ,

$$g_t(\mathbf{r}_1^{t-1}, \dots, \mathbf{r}_s^{t-1}) \leq \mathbb{E}_{\tilde{\mathbf{r}}_1^{t-1}} [g_t(\mathbf{r}_1^{t-1}, \dots, \mathbf{r}_s^{t-1})] + B \sqrt{\frac{\log \frac{1}{\delta}}{2s}}$$

Analyzing the expectation term we get

$$\begin{aligned} & \mathbb{E}_{\tilde{\mathbf{r}}_1^{t-1}} [g_t(\mathbf{r}_1^{t-1}, \dots, \mathbf{r}_s^{t-1})] \\ &= \mathbb{E}_{\tilde{\mathbf{r}}_1^{t-1}} \left[ \sup_{h \in \mathcal{H}} \left[ \mathbb{E}_{\tilde{\mathbf{r}}_1^{t-1}, \dots, \tilde{\mathbf{r}}_s^{t-1}} \left[ \hat{\mathcal{L}}_t^{\text{buf}}(h) \right] - \hat{\mathcal{L}}_t^{\text{buf}}(h) \right] \right] \\ &\leq \mathbb{E}_{\tilde{\mathbf{r}}_1^{t-1}, \tilde{\mathbf{r}}_j^{t-1}} \left[ \sup_{h \in \mathcal{H}} \left[ \frac{1}{s} \sum_{j=1}^s \ell(h, \mathbf{z}_t, \tilde{\zeta}_j) - \ell(h, \mathbf{z}_t, \zeta_j) \right] \right] \\ &= \mathbb{E}_{\tilde{\mathbf{r}}_1^{t-1}, \tilde{\mathbf{r}}_j^{t-1}, \epsilon_j} \left[ \sup_{h \in \mathcal{H}} \left[ \frac{1}{s} \sum_{j=1}^s \epsilon_j \left( \ell(h, \mathbf{z}_t, \tilde{\zeta}_j) - \ell(h, \mathbf{z}_t, \zeta_j) \right) \right] \right] \\ &\leq 2 \mathbb{E}_{\tilde{\mathbf{r}}_1^{t-1}, \tilde{\mathbf{r}}_j^{t-1}, \epsilon_j} \left[ \sup_{h \in \mathcal{H}} \left[ \frac{1}{s} \sum_{j=1}^s \epsilon_j \ell(h, \mathbf{z}_t, \zeta_j) \right] \right] \\ &\leq 2 \mathcal{R}_s(\ell \circ \mathcal{H}) \end{aligned}$$

where in the third step we have used the fact that symmetrizing a pair of true and ghost ensemble variables

is equivalent to symmetrizing the buffer elements they determine. In the last step we have exploited the definition of Rademacher averages with the (empirical) measure  $\frac{1}{t-1} \sum_{\tau=1}^{t-1} \delta_{\mathbf{z}_\tau}$  imposed over the domain  $\mathcal{Z}$ .

For hypothesis classes for which we have  $\hat{\mathcal{R}}_s(\ell \circ \mathcal{H}) = C_d \cdot \mathcal{O}\left(\sqrt{\frac{1}{s}}\right)$ , this proves the claim.  $\square$

Using a similar proof progression we can also show the following:

**Lemma 25.** *For any fixed  $h \in \mathcal{H}$  and any  $t \in [1, n-1]$ , with probability at least  $1 - \delta$  over the choice of the random variables used to update the buffer  $B$  until time  $t$ , we have*

$$\hat{\mathcal{L}}_t^{\text{buf}}(h) \leq \hat{\mathcal{L}}_t(h) + C_d \cdot \mathcal{O}\left(\sqrt{\frac{\log \frac{1}{\delta}}{s}}\right)$$

Combining Lemmata 24 and 25 and taking a union bound over all time steps, the following corollary gives us a *buffer to all-pairs* conversion bound.

**Lemma 26.** *Suppose we have an online learning algorithm that incurs buffer penalties based on a buffer  $B$  of size  $s$  that is updated using the **RS- $\mathbf{x}$**  algorithm. Suppose further that the learning algorithm generates an ensemble  $h_1, \dots, h_{n-1}$ . Then with probability at least  $1 - \delta$  over the choice of the random variables used to update the buffer  $B$ , we have*

$$\mathfrak{R}_n \leq \mathfrak{R}_n^{\text{buf}} + C_d(n-1) \cdot \mathcal{O}\left(\sqrt{\frac{\log \frac{n}{\delta}}{s}}\right),$$

where we recall the definition of the all-pairs regret as

$$\mathfrak{R}_n := \sum_{t=2}^n \hat{\mathcal{L}}_t(h_{t-1}) - \inf_{h \in \mathcal{H}} \sum_{t=2}^n \hat{\mathcal{L}}_t(h)$$

and the finite-buffer regret as

$$\mathfrak{R}_n^{\text{buf}} := \sum_{t=2}^n \hat{\mathcal{L}}_t^{\text{buf}}(h_{t-1}) - \inf_{h \in \mathcal{H}} \sum_{t=2}^n \hat{\mathcal{L}}_t^{\text{buf}}(h).$$

*Proof.* Let  $\hat{h} := \arg \inf_{h \in \mathcal{H}} \sum_{t=2}^n \hat{\mathcal{L}}_t(h)$ . Then Lemma 25 gives us, upon summing over  $t$  and taking a union bound,

$$\sum_{t=2}^n \hat{\mathcal{L}}_t^{\text{buf}}(\hat{h}) \leq \sum_{t=2}^n \hat{\mathcal{L}}_t(\hat{h}) + C_d(n-1) \cdot \mathcal{O}\left(\sqrt{\frac{\log \frac{n}{\delta}}{s}}\right), \quad (11)$$

whereas Lemma 24 similarly guarantees

$$\sum_{t=2}^n \hat{\mathcal{L}}_t(h_{t-1}) \leq \sum_{t=2}^n \hat{\mathcal{L}}_t^{\text{buf}}(h_{t-1}) + C_d(n-1) \cdot \mathcal{O}\left(\sqrt{\frac{\log \frac{n}{\delta}}{s}}\right) \quad (12)$$

where both results hold with high confidence. Adding the Equations (11) and (12) and using  $\sum_{t=2}^n \hat{\mathcal{L}}_t^{\text{buf}}(h_{t-1}) \leq \inf_{h \in \mathcal{H}} \sum_{t=2}^n \hat{\mathcal{L}}_t^{\text{buf}}(h) + \mathfrak{R}_n^{\text{buf}}$  completes the proof.  $\square$

As the final step of the proof, we give below a *finite-buffer* regret bound for the **OLP** algorithm.

**Lemma 27.** *Suppose the **OLP** algorithm working with an  $s$ -sized buffer generates an ensemble  $\mathbf{w}_1, \dots, \mathbf{w}_{n-1}$ . Further suppose that the loss function  $\ell$  being used is  $L$ -Lipschitz and the space of hypotheses  $\mathcal{W}$  is a compact subset of a Banach space with a finite diameter  $D$  with respect to the Banach space norm. Then we have*

$$\mathfrak{R}_n^{\text{buf}} \leq LD\sqrt{n-1}$$

*Proof.* We observe that the algorithm **OLP** is simply a variant of the GIGA algorithm (Zinkevich, 2003) being applied with the loss functions  $\ell_t^{\text{GIGA}} : \mathbf{w} \mapsto \hat{\mathcal{L}}_t^{\text{buf}}(\mathbf{w})$ . Since  $\ell_t^{\text{GIGA}}$  inherits the Lipschitz constant of  $\hat{\mathcal{L}}_t^{\text{buf}}$  which in turn inherits it from  $\ell$ , we can use the analysis given by Zinkevich (2003) to conclude the proof.  $\square$

Combining Lemmata 26 and 27 gives us the following result:

**Theorem 28** (Theorem 8 restated). *Suppose the **OLP** algorithm working with an  $s$ -sized buffer generates an ensemble  $\mathbf{w}_1, \dots, \mathbf{w}_{n-1}$ . Then with probability at least  $1 - \delta$ ,*

$$\frac{\mathfrak{R}_n}{n-1} \leq \mathcal{O}\left(C_d \sqrt{\frac{\log \frac{n}{\delta}}{s}} + \sqrt{\frac{1}{n-1}}\right)$$

## J. Implementing the RS-x Algorithm

Although the **RS-x** algorithm presented in the paper allows us to give clean regret bounds, it suffers from a few drawbacks. From a theoretical point of view, the algorithm is inferior to Vitter's **RS** algorithm in terms of randomness usage. The **RS** algorithm (see (Zhao et al., 2011) for example) uses a Bernoulli random variable and a discrete uniform random variable at each time step. The discrete random variable takes values in  $[s]$  as a result of which the algorithm uses a total of  $\mathcal{O}(\log s)$  random bits at each step.

**Algorithm 3 RS-x<sup>2</sup> :** An Alternate Implementation of the **RS-x** Algorithm

---

**Input:** Buffer  $B$ , new point  $\mathbf{z}_t$ , buffer size  $s$ , timestep  $t$   
**Output:** Updated buffer  $B_{\text{new}}$

---

```

1: if  $|B| < s$  then //There is space
2:    $B_{\text{new}} \leftarrow B \cup \{\mathbf{z}_t\}$ 
3: else //Overflow situation
4:   if  $t = s + 1$  then //Repopulation step
5:      $\text{TMP} = B \cup \{\mathbf{z}_t\}$ 
6:      $B_{\text{new}} = \phi$ 
7:     for  $i = 1$  to  $s$  do
8:       Select random  $\mathbf{r} \in \text{TMP}$  with replacement
9:        $B_{\text{new}} \leftarrow B_{\text{new}} \cup \{\mathbf{r}\}$ 
10:    end for
11:  else //Normal update step
12:     $B_{\text{new}} \leftarrow B$ 
13:    Sample  $k \sim \text{Binomial}(s, 1/t)$ 
14:    Remove  $k$  random elements from  $B_{\text{new}}$ 
15:     $B_{\text{new}} \leftarrow B_{\text{new}} \cup \left(\coprod_{i=1}^k \{\mathbf{z}_t\}\right)$ 
16:  end if
17: end if
18: return  $B_{\text{new}}$ 

```

---

The **RS-x** algorithm as proposed, on the other hand, uses  $s$  Bernoulli random variables at each step (to decide which buffer elements to replace with the incoming point) taking its randomness usage to  $\mathcal{O}(s)$  bits. From a practical point of view this has a few negative consequences:

1. Due to increased randomness usage, the variance of the resulting algorithm increases.
2. At step  $t$ , the Bernoulli random variables required all have success probability  $1/t$ . This quantity drops down to negligible values for even moderate values of  $t$ . Note that Vitter's **RS** on the other hand requires a Bernoulli random variable with success probability  $s/t$  which dies down much more slowly.
3. Due to the requirement of such high precision random variables, the imprecisions of any pseudo random generator used to simulate this algorithm become apparent resulting in poor performance.

In order to ameliorate the situation, we propose an alternate implementation of the *normal* update step of the **RS-x** algorithm in Algorithm 3. We call this new sampling policy **RS-x<sup>2</sup>**. We shall formally demonstrate the equivalence of the **RS-x** and the **RS-x<sup>2</sup>** policies by showing that both policies result in a buffer whose each element is a uniform sample from the preceding stream with replacement. This shall be done by proving that the joint distribution of the buffer elements remains the same whether the **RS-x** *normal* update is applied or the **RS-x<sup>2</sup>** *normal* step is ap-

plied (note that **RS-x** and **RS-x<sup>2</sup>** have identical *re-population steps*). This will ensure that any learning algorithm will be unable to distinguish between the two update mechanisms and consequently, our regret guarantees shall continue to hold.

First we analyze the randomness usage of the **RS-x<sup>2</sup>** update step. The update step first samples a number  $K_t \sim B(s, 1/t)$  from the binomial distribution and then replaces  $K_t$  random locations with the incoming point. Choosing  $k$  locations without replacement from a pool of  $s$  locations requires at most  $k \log s$  bits of randomness. Since  $K_t$  is sampled from the binomial distribution  $B(s, 1/t)$ , we have  $K_t = \mathcal{O}(1)$  in expectation (as well as with high probability) since  $t > s$  whenever this step is applied. Hence our randomness usage per update is at most  $\mathcal{O}(\log s)$  random bits which is much better than the randomness usage of **RS-x** and that actually matches that of Vitter's **RS** upto a constant.

To analyze the statistical properties of the **RS-x<sup>2</sup>** update step, let us analyze the state of the buffer after the update step. In the **RS-x** algorithm, the state of the buffer after an update is completely specified once we enumerate the locations that were replaced by the incoming point. Let the indicator variable  $R_i$  indicate whether the  $i^{\text{th}}$  location was replaced or not. Let  $r \in \{0, 1\}^s$  denote a *fixed* pattern of replacements. Then the original implementation of the update step of **RS-x** guarantees that

$$\mathbb{P}_{\mathbf{RS-x}} \left[ \bigwedge_{i=1}^s (R_i = r_i) \right] = \left( \frac{1}{t} \right)^{\|r\|_1} \left( 1 - \frac{1}{t} \right)^{s - \|r\|_1}$$

To analyze the same for the alternate implementation of the **RS-x<sup>2</sup>** update step, we first notice that choosing  $k$  items from a pool of  $s$  without replacement is identical to choosing the first  $k$  locations from a random permutation of the  $s$  items. Let us denote  $\|r\|_1 = k$ . Then we have,

$$\begin{aligned} \mathbb{P}_{\mathbf{RS-x}^2} \left[ \bigwedge_{i=1}^s (R_i = r_i) \right] &= \sum_{j=1}^s \mathbb{P} \left[ \bigwedge_{i=1}^s (R_i = r_i) \wedge K_t = j \right] \\ &= \mathbb{P} \left[ \bigwedge_{i=1}^s (R_i = r_i) \wedge K_t = k \right] \\ &= \mathbb{P} \left[ \bigwedge_{i=1}^s (R_i = r_i) \middle| K_t = k \right] \mathbb{P}[K_t = k] \end{aligned}$$

We have

$$\mathbb{P}[K_t = k] = \binom{s}{k} \left( \frac{1}{t} \right)^k \left( 1 - \frac{1}{t} \right)^{s-k}$$

The number of arrangements of  $s$  items such that some specific  $k$  items fall in the first  $k$  positions is  $k!(s-k)!$ .

Thus we have

$$\begin{aligned} \mathbb{P}_{\mathbf{RS-x}^2} \left[ \bigwedge_{i=1}^s (R_i = r_i) \right] &= \binom{s}{k} \left( \frac{1}{t} \right)^k \left( 1 - \frac{1}{t} \right)^{s-k} \frac{k!(s-k)!}{s!} \\ &= \left( \frac{1}{t} \right)^k \left( 1 - \frac{1}{t} \right)^{s-k} \\ &= \mathbb{P}_{\mathbf{RS-x}} \left[ \bigwedge_{i=1}^s (R_i = r_i) \right] \end{aligned}$$

which completes the argument.

## K. Additional Experimental Results

Here we present experimental results on 14 different benchmark datasets (refer to Figure 3) comparing the **OLP** algorithm using the **RS-x<sup>2</sup>** buffer policy with the **OAM<sub>gra</sub>** algorithm using the **RS** buffer policy. We continue to observe the trend that **OLP** performs competitively to **OAM<sub>gra</sub>** while enjoying a slight advantage in small buffer situations in most cases.

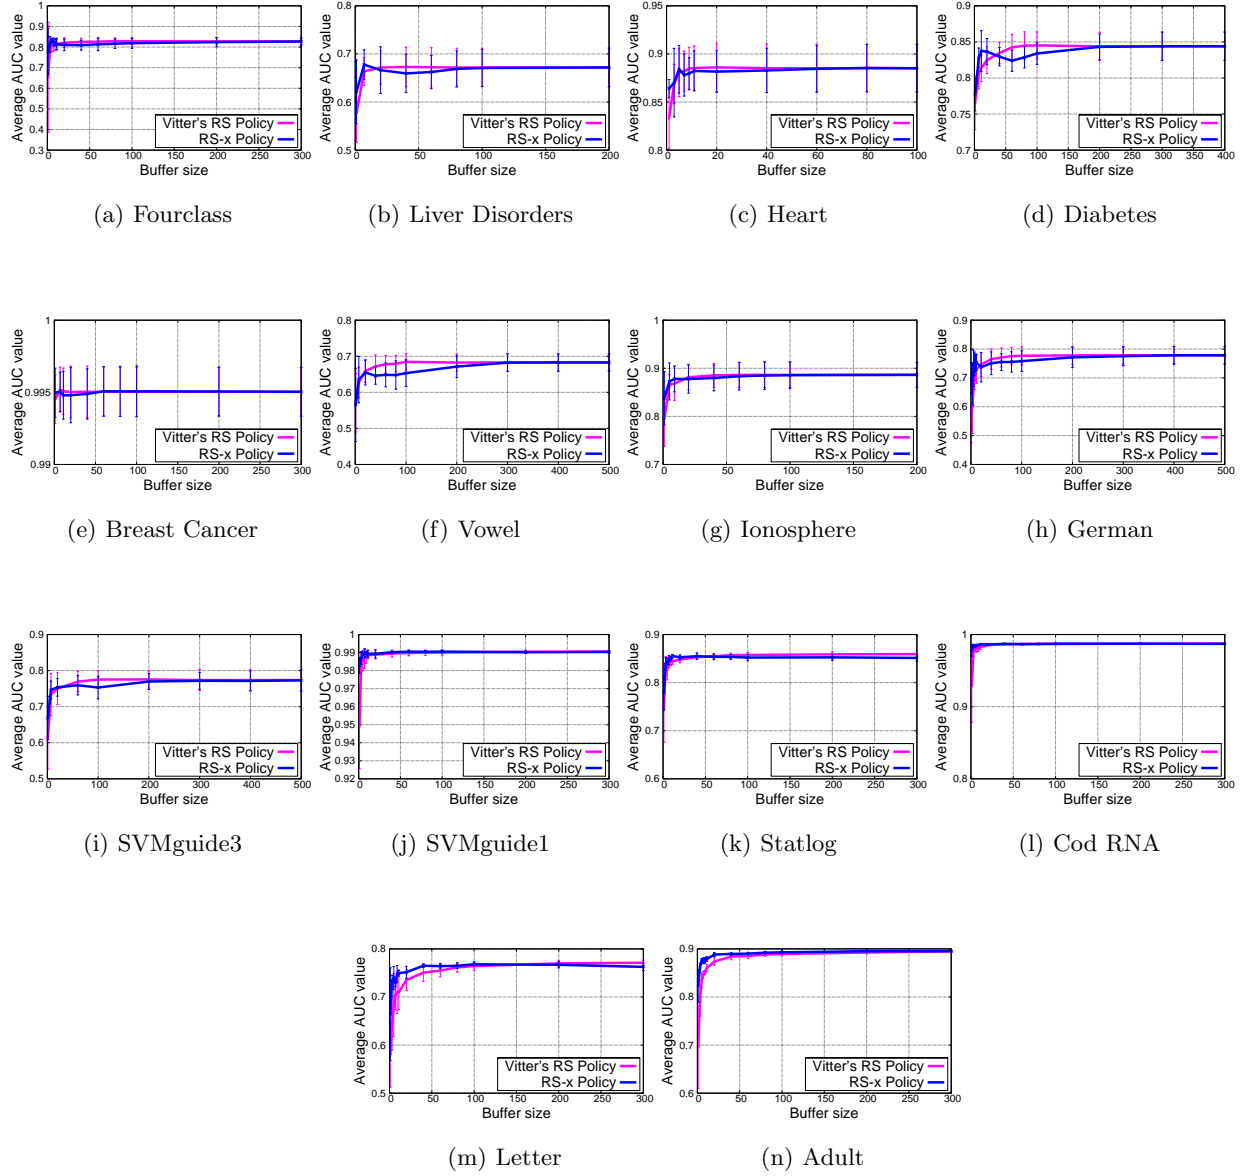

Figure 3. Comparison between  $OAM_{gra}$  (using **RS** policy) and **OLP** (using **RS-x** policy) on AUC maximization tasks.
